# 1 Emergence of time persistence in a 2 data-driven neural network model

3 **Sebastien Wolf**<sup>a,1†</sup>, **Guillaume Le Goc**<sup>b,1†</sup>, **Georges Debrégeas**<sup>b,2‡</sup>, **Simona Cocco**<sup>a,2‡</sup>,  
4 **Rémi Monasson**<sup>a,2‡</sup>

**\*For correspondence:**

[remi.monasson@phys.ens.fr](mailto:remi.monasson@phys.ens.fr) (RM)

<sup>†</sup>Equally contributed to this work.

<sup>‡</sup>Senior authors with equal contributions.

5 <sup>a</sup>Laboratory of Physics of the Ecole Normale Supérieure, CNRS UMR 8023 & PSL  
6 Research, Sorbonne Université, Université de Paris, Paris, France; <sup>b</sup>Sorbonne Université,  
7 CNRS, Institut de Biologie Paris-Seine (IBPS), Laboratoire Jean Perrin (LJP), Paris, France

---

9 **Abstract** Establishing accurate as well as interpretable models of network activity is an open  
10 challenge in systems neuroscience. Here we infer an energy-based model of the ARTR, a circuit  
11 that controls zebrafish swimming statistics, using functional recordings of the spontaneous  
12 activity of hundreds of neurons. Although our model is trained to reproduce the low-order  
13 statistics of the network activity at short time-scales, its simulated dynamics quantitatively  
14 captures the slowly alternating activity of the ARTR. It further reproduces the modulation of this  
15 persistent dynamics by the water temperature and visual stimulation. Mathematical analysis of  
16 the model unveils a low-dimensional landscape-based representation of the ARTR activity, where  
17 the slow network dynamics reflects Arrhenius-like barriers crossings between metastable states.  
18 Our work thus shows how data-driven models built from large neural populations recordings can  
19 be reduced to low-dimensional functional models in order to reveal the fundamental  
20 mechanisms controlling the collective neuronal dynamics.

---

## 22 Introduction

23 How computational capacities emerge from the collective neural dynamics within large circuits  
24 is a prominent question in neuroscience. Modeling efforts have long been based on top-down  
25 approaches, in which mathematical models are designed to replicate basic functions. Although  
26 they might be very fruitful from a conceptual viewpoint, these models are unable to accurately re-  
27 produce actual data and thus remain speculative. Recently, progress in large-scale recording and  
28 simulation techniques have led to the development of bottom-up approaches. Machine-learning  
29 models, trained on recorded activity, allow for the decoding or the prediction of neuronal activity  
30 and behavior (*Glaser et al., 2020; Pandarinath et al., 2018*). Unfortunately, the blackbox nature  
31 of these data-driven models often obscures their biological interpretation, e.g. the identification  
32 of the relevant computational units (*Butts, 2019*). This calls for quantitative, yet interpretable ap-  
33 proaches to illuminate the functions carried out by large neural populations and their neuronal  
34 substrate.

35 The present work is an attempt to do so in the specific context of the anterior rhombencephalic  
36 turning region (ARTR), a circuit in the zebrafish larva that drives the saccadic dynamics and orches-  
37 trates the chaining of leftward/rightward swim bouts (*Ahrens et al., 2013; Dunn et al., 2016; Wolf*  
38 *et al., 2017; Ramirez and Aksay, 2021; Leyden et al., 2021*). The ARTR spontaneous activity exhibits  
39 temporal persistence, i.e. the maintenance of activity patterns over long ( $\sim 10$  sec) time-scales.  
40 This functional feature is ubiquitous in the vertebrate brain. It plays an essential role in motor con-  
41 trol, as best exemplified by the velocity position neural integrator, a circuit that integrates neural  
42 inputs and allows for a maintenance of the eye position after an ocular saccade (*Seung, 1996; Se-*

43 *ung et al., 2000; Miri et al., 2011*). Temporal persistence is also central to action selection (*Wang,*  
44 *2008*) and short-term memory storage (*Zaksas and Pasternak, 2006; Guo et al., 2017*). As isolated  
45 neurons generally display short relaxation times, neural persistence is thought to be an emergent  
46 property of recurrent circuit architectures (*Zylberberg and Strowbridge, 2017*). Since the 1970s,  
47 numerous mechanistic network models have been proposed that display persistent activity. They  
48 are designed such as to possess attractor states, i.e. stable activity patterns towards which the  
49 network spontaneously converges.

50 Although attractor models are conceptually appealing, assessing their relevance in biological  
51 circuits remains challenging. To this aim, recent advances in machine learning combined with  
52 large-scale methods of neural recordings may offer a promising avenue. We hereafter focus on  
53 energy-based network models, trained to replicate low-order data statistics, such as the mean  
54 activities and pairwise correlations, through the maximum entropy principle (*Jaynes, 1957*). In  
55 neuroscience, such models have been successfully used to explain correlation structures in many  
56 areas, including the retina (*Schneidman et al., 2006; Cocco et al., 2009; Tkačik et al., 2015*), the  
57 cortex (*Tavoni et al., 2016, 2017; Nghiem et al., 2018*), and the hippocampus (*Meshulam et al.,*  
58 *2017; Posani et al., 2017*) of vertebrates, and the nervous system of *C. elegans* (*Chen et al., 2019*).  
59 These models are generative, i.e. they can be used to produce synthetic activity on short time  
60 scales, but whether they can reproduce long-time dynamical features of the biological networks  
61 remains an open question.

62 Here, we first report on spontaneous activity recordings of the ARTR network using light-sheet  
63 functional imaging at various yet ethologically relevant temperatures. These data demonstrate  
64 that the water temperature controls the persistence time scale of the ARTR network, and that this  
65 modulation is in quantitative agreement with the thermal dependence of the swimming statistics.  
66 We then infer energy-based models from the calcium activity recordings, and show how these  
67 data-driven models not only capture the characteristics and probabilities of occurrence of activity  
68 patterns, but also reproduce the observed thermal dependence of the persistent time scale. We  
69 further derive a mathematically tractable version of our energy-based model, called mean-field  
70 approximation, whose resolution provides a physical interpretation of the energy landscape, of  
71 the dynamical paths there in, and of their changes with temperature. We finally extend the model  
72 to incorporate visual stimulation and correctly reproduce the previously reported visually-driven  
73 ARTR dynamics (*Wolf et al., 2017*). This work establishes the capacity of data-driven network in-  
74 ference to numerically emulate persistent dynamics and to unveil fundamental network features  
75 controlling such dynamics.

## 76 Results

### 77 **The water temperature controls behavioral and neuronal persistence time-scales** 78 **in zebrafish larvae**

79 In this first section, we report on functional recordings of the ARTR dynamics performed at various  
80 temperatures (18 to 33°C). We show that the persistent time-scale that characterizes the ARTR's  
81 endogenous dynamics is thermally modulated. This dependence is reflected in the change in swim-  
82 ming statistics observed in freely swimming assays. We further characterize how the water tem-  
83 perature impacts the distribution of activity patterns

#### 84 ARTR endogeneous dynamics is thermally modulated

85 We used light-sheet functional imaging to record the ARTR activity in zebrafish larvae expressing  
86 a calcium reporter pan-neuronally (*Tg(elavl3:GCaMP6)*). The larvae, embedded in agarose, were  
87 placed in a water tank whose temperature was controlled in the range 18–33°C (see Appendix 2  
88 Figure 1A). ARTR neurons were identified using a combination of morphological and functional  
89 criteria, as detailed in *Wolf et al. (2017)*. Their spatial organization is displayed in Figure 1A, for  
90 all recorded animals after morphological registration on a unique reference brain ( $145 \pm 65$  left

91 neurons,  $165 \pm 69$  right neurons, mean  $\pm$  s.d. across 13 different fish, see Appendix 2 Table 1).  
92 For each neuron, an approximate spike train  $s(t)$  was inferred from the fluorescence signal us-  
93 ing Bayesian deconvolution (Tubiana et al., 2020). A typical raster plot of the ARTR is shown in  
94 Appendix 2 Figure 1B (recorded at 26°C), together with the mean signals of the left and right sub-  
95 circuits,  $m_{L,R}(t) = \frac{1}{N_{L,R}} \sum_{i \in L,R} s_i(t)$ .

96 To analyse the thermal dependence of the ARTR dynamics, we extracted from these recordings  
97 a binarized ARTR signal,  $\text{sign}(m_L(t) - m_R(t))$ , see Figure 1B and Appendix 2 Figure 1C for example  
98 signals from the same fish at different temperatures. The average power spectra of these signals  
99 for the five tested temperatures (average of 3 to 8 animals for each temperature, see Appendix  
100 2 Table 1), are shown in Figure 1C. We used a Lorentzian fit to further extract the alternation fre-  
101 quency  $\nu$  for each dataset (Figure 1C, solid lines). This frequency was found to increase with the  
102 temperature (Figure 1D). Although  $\nu$  could significantly vary across specimen at a given tempera-  
103 ture, for a given animal, increasing the temperature induced an increase in the frequency in 87.5%  
104 of our recordings (28 out of 32 pairs of recordings).

105 In this analysis, we used the binarized ARTR activity to facilitate the comparison between be-  
106 havioral and neural data, as described in the next section. However, the observed temperature-  
107 dependence of the left-right alternation time-scale was preserved when the spectra were com-  
108 puted from the ARTR activity,  $m_L(t) - m_R(t)$  (see Appendix 2 Figure 1D).

### 109 Impact of the water temperature on the turn direction persistence 110 in freely swimming larvae

111 It has previously been shown that the ARTR governs the selection of swim bout orientations:  
112 turn bouts are preferentially executed in the direction of the most active (right or left) ARTR sub-  
113 circuit (Dunn et al., 2016; Wolf et al., 2017), such that  $\text{sign}(m_L(t) - m_R(t))$  constitutes a robust pre-  
114 dictor of the turning direction of the animal, see figure 5 - figure supplement 2E in Dunn et al.  
115 (2016). Therefore, the temporal persistence of the ARTR dynamics is reflected in a turn direction  
116 persistence in the animal's swimming pattern, i.e. the preferred chaining of similarly orientated  
117 turn bouts.

118 We thus sought to examine whether the thermal dependence of the ARTR endogenous dynam-  
119 ics could manifest itself in the animal navigational statistics. In order to do so, we used the results of  
120 a recent study (Le Goc et al., 2021), in which 5 to 7 days old zebrafish larvae were video-monitored  
121 as they swam freely at constant and uniform temperature in the same thermal range (Figure 1E).  
122 We quantified the time scale of the turn direction persistence by assigning a discrete value to each  
123 turn bout:  $-1$  for a right turn,  $+1$  for a left turn (forward scouts were ignored). We then computed  
124 an orientational state signal continuously defined by the value of the last turn bout (Figure 1F). The  
125 power spectra of the resulting binary signals are shown in Figure 1G for various temperatures. We  
126 used a Lorentzian fit (Methods, Eq. 6) to extract, for each experiment, a frequency  $k_{flip}$ . This rate,  
127 which defines the probability of switching orientation per unit of time, systematically increases with  
128 the temperature, from 0.1 to 0.6  $\text{s}^{-1}$  (Figure 1H). Increasing the temperature thus leads to a progres-  
129 sive reduction of the turn direction persistence time. The inset plot in Figure 1H establishes that  
130 the left/right alternation rates extracted from behavioral and neuronal recordings are consistent  
131 across the entire temperature range (slope = 0.81,  $R = 0.99$ ).

### 132 ARTR activity maps are modulated by the temperature

133 We then investigated how the water temperature impacts the statistics of the ARTR activity defined  
134 by the mean activity of the left and right sub-populations,  $m_L$  and  $m_R$ . The probability maps in  
135 the  $(m_L, m_R)$  plane are shown in Figure 2A for two different temperatures, with the corresponding  
136 raster plots and time signals of the two subcircuits. At high temperature, the ARTR activity map is  
137 confined within a L-shaped region around  $(m_L = 0, m_R = 0)$  and the circuit remains inactive for a  
138 large fraction of the time. Conversely, at lower temperature, the ARTR activity is characterized by  
139 long periods during which both circuits are active and shorter periods of inactivity. We quantified

140 this thermal dependence of the activity distribution by computing the log-probability of the activity  
141 of either region of the ARTR at various temperatures (Appendix 2 Figure 2A). The occupation rate  
142 of the inactive state ( $m_{L,R} \sim 0$ ) increases with temperature, with a corresponding steeper decay of  
143 the probability distribution of the activity. Consistently, we found that the mean activities  $m_L$  and  
144  $m_R$  decreased with temperature (Appendix 2 Figure 2B). Such a dependence might reflect varying  
145 levels of temporal coherence in the activity of the ARTR with the temperature. In order to test this,  
146 we computed the Pearson correlation at various temperature but we saw no clear dependency of  
147 the average correlation across ipsilateral or contralateral pairs of neurons (Appendix 2 Figure 2C).

148 Our analysis thus indicates that the water temperature modulates both the endogenous dy-  
149 namics and the activity distribution of the ARTR. For both aspects, we noticed a large variability  
150 between animals at a given temperature. This is not unexpected, as it parallels the intra- and  
151 inter-individual variability in the fish exploratory kinematics reported in *Le Goc et al. (2021)*. Nev-  
152 ertheless, we observed a strong positive correlation between the persistence time and the mean  
153 activity across animals and trials for a given temperature (Appendix 2 Figure 2D and Methods),  
154 indicating that both features of the ARTR may have a common drive.

### 155 **A data-driven energy-based model reproduces the statistics of the ARTR dynamics**

156 Our aim was to reproduce the ARTR spontaneous activity using an energy-based data-driven net-  
157 work model. The inference pipeline, going from raw fluorescence data to the model, is summarized  
158 in Figure 2B. We first reconstructed an estimated spike train for each ARTR neuron using a decon-  
159 volution algorithm (*Tubiana et al., 2020*). We divided the recording window ( $T_{rec} \sim 1200$  s for each  
160 session) in time bins whose width was set by the imaging frame-rate ( $dt = 100 - 300$ ms). Each  
161 dataset thus consisted of a series of snapshots  $\mathbf{s}^k = (s_1^k, \dots, s_N^k)$  of the ARTR activity at times  $k$ , with  
162  $k = 1, \dots, T_{rec}/dt$ ; here,  $s_i^k = 1$  if cell  $i$  is active or  $s_i^k = 0$  if it is silent in time bin  $k$ .

163 We then computed the mean activities,  $\langle s_i \rangle_{data}$ , and the pairwise correlations,  $\langle s_i s_j \rangle_{data}$ , as the  
164 averages of, respectively,  $s_i^k$  and  $s_i^k s_j^k$  over all time bins  $k$ . We next inferred the least constrained  
165 model, according to the maximum entropy principle (*Jaynes, 1957*), that reproduced these quan-  
166 tities. This model, known as the Ising model in statistical mechanics (*Ma, 1985*) and probabilistic  
167 graphical model in statistical inference (*Koller and Friedmann, 2009*), describes the probability dis-  
168 tribution over all  $2^N$  possible activity configurations  $\mathbf{s}$ ,

$$P(\mathbf{s}) = \frac{1}{Z} \exp \left( \sum_i h_i s_i + \sum_{i < j} J_{ij} s_i s_j \right), \quad (1)$$

169 where  $Z$  is a normalization constant. The bias  $h_i$  controls the intrinsic activity of neuron  $i$ , while the  
170 coupling parameters  $J_{ij}$  account for the effect of the other neurons  $j$  activity on neuron  $i$  (Meth-  
171 ods). The set of parameters  $\{h_i, J_{ij}\}$  were inferred using the Adaptive Cluster Expansion and the  
172 Boltzmann machine algorithms (*Cocco and Monasson, 2011; Barton and Cocco, 2013; Barton et al.,*  
173 *2016*). Notice that in Eq. 1, the energy term in the parenthesis is not scaled by a thermal energy  
174 as in the Maxwell-Boltzmann statistics. We thus implicitly fix the model temperature to unity; of  
175 course, this model temperature has no relation with the water temperature  $T$ . Although the model  
176 was trained to reproduce the mean activities and pairwise correlations (see Appendix 2 Figure 3A-  
177 C and Methods for 4-fold cross-validation), it further captured higher-order statistical properties  
178 of the activity such as the probability that  $K$  cells are active in a time bin (Appendix 2 Figure 3D)  
179 (*Schneidman et al., 2006*).

180 Once inferred, the Ising model can be used to generate synthetic activity configurations  $\mathbf{s}$ . Here  
181 we used a Monte Carlo (MC) algorithm to sample the probability distribution  $P(\mathbf{s})$  in Eq. 1. The algo-  
182 rithm starts from a random configuration of activity, then picks up uniformly at random a neuron  
183 index, say,  $i$ . The activity  $s_i$  of neuron  $i$  is then stochastically updated to 0 or to 1, with probabilities  
184 that depend on the current states  $s_j$  of the other neurons (see Eq. 8 in Methods, and code pro-  
185 vided). The sampling procedure is iterated, ensuring convergence towards the distribution  $P$  in Eq.

186 1. This *in silico* MC dynamics is not supposed to reproduce any realistic neural dynamics, except  
187 for the locality in the activity configuration  $s$  space.

188 Figure 2C shows the synthetic activity maps and temporal traces of Ising models trained on the  
189 two same datasets as in Figure 2A. For these synthetic signals, we use MC rounds, i.e. the number  
190 of MC steps divided by the total number of neurons (Methods), as a proxy for time. Remarkably,  
191 although the Ising model is trained to reproduce the low-order statistics of the neuronal activity  
192 within a time bin only, the generated signals exhibit the main characteristics of the ARTR dynamics,  
193 i.e. a slow alternation between the left and right sub-populations associated with long persistence  
194 times, see raster plots in Figure 2C.

### 195 Comparison of experimental and synthetic ARTR dynamics across recordings

196 We repeated the inference procedure described above for all our 32 recordings (carried out with  
197  $n = 13$  fish and 5 different water temperatures, see Appendix 2 Table 2) and obtained the same  
198 number of sets of biases and couplings. We first compared the distributions of the left-right mean  
199 activity  $m_L = \frac{1}{N_L} \sum_{i \in L} s_i$  and  $m_R = \frac{1}{N_R} \sum_{i \in R} s_i$  extracted from the data and from the Ising model.  
200 In order to do so, we used the Kullback-Leibler (KL) divergence, a classical metrics of the dissimi-  
201 larity between two probability distributions. The distribution of the KL divergences between the  
202 experimental test datasets (see Methods) and their associated Ising models is shown in green in  
203 Figure 3A. The KL values were found to be much smaller than those obtained between experimen-  
204 tal test datasets and Ising models trained from different recordings (red distribution). This result  
205 establishes that the Ising model quantitatively reproduces the ARTR activity distribution associated  
206 to each specimen and temperature.

207 This agreement crucially relies on the presence of inter-neuronal couplings in order to repro-  
208 duce the pairwise correlations in the activity: a model with no connection (i.e. the independent  
209 model, see Methods) fitted to reproduce the neural firing rates, offers a very poor description of  
210 the data, see Figure 3A (dark blue distribution) and Appendix 2 Figure 3E-G.

211 Finally, we examined to what extent the synthetic data could capture the neural persistence  
212 characteristics of the ARTR. The persistence times extracted from the data and from the MC simu-  
213 lations of the inferred models were found to be strongly correlated (Figure 3B,  $R = 0.84$ ). The MC  
214 dynamics thus captures the inter-individual variability and temperature dependence of the ARTR  
215 persistent dynamics.

### 216 Spatial organization and temperature dependence of the Ising inferred parameters

217 In all recordings, inferred ipsilateral couplings are found to be centered around a positive value (std  
218 = 0.12, mean = 0.062), while contralateral couplings are distributed around 0 (mean = -0.001, std  
219 = 0.10), see Appendix 2 Figure 4A-C. Still, a significant fraction of these contralateral couplings are  
220 strongly negative. We illustrated this point by computing the fraction of neuronal pairs  $(i, j)$  that are  
221 contralateral for each value of the coupling  $J_{ij}$  or the Pearson correlation (Appendix 2 Figure 4D-E).  
222 Large negative values of couplings or correlations systematically correspond to contralateral pairs  
223 of neurons, whereas large positive values correspond to ipsilateral pairs of neurons.

224 In addition, we found that the ipsilateral couplings  $J_{ij}$  decay, on average, exponentially with  
225 the distance between neurons  $i$  and  $j$  (Appendix 2 Figure 4F), in agreement with findings in other  
226 neural systems (Posani *et al.*, 2018). Spatial structure is also present in contralateral couplings  
227 (Appendix 2 Figure 4G). Biases display a wide distribution ranging from -8 to 0 (std = 1.1, mean =  
228 -4.1, Appendix 2 Figure 5A-C), with no apparent spatial structure.

229 We next examined the dependency of the Ising model parameters on the water temperature.  
230 To do so, for each fish, we selected two different water temperatures, and the corresponding sets  
231 of inferred biases and couplings,  $\{h_i, J_{ij}\}$ . We then computed the Pearson correlation coefficient  $R^2$   
232 of the biases and of the coupling matrices at these two temperatures (inset of Appendix 2 Figure 6).  
233 We saw no clear correlation between the model parameters at different temperatures, as shown by  
234 the distribution of  $R^2$  computed across fish and across every temperatures (Appendix 2 Figure 6).



## 235 Mean-field study of the inferred model unveils the energy landscape underlying 236 the ARTR dynamics

237 Mean-field approximation to the data-driven graphical model

238 While our data-driven Ising model reproduces the dependence of the persistence time-scale and  
239 activity distribution on the water temperature, why it does so remains unclear. To understand what  
240 features of the coupling and local bias parameters govern these network functional properties, we  
241 turn to mean-field theory. This powerful and mathematically tractable approximation scheme is  
242 commonly used in statistical physics to study systems with many strongly interacting components  
243 (Ma, 1985). In the present case, it amounts to deriving self-consistent equations for the mean  
244 activities  $m_L$  and  $m_R$  of the left and right ARTR subpopulations (Figure 4A and Appendix 1).

245 Within mean-field theory, each neuron  $i$  is subject to (i) a local bias  $H$ , (ii) an excitatory coupling  
246  $J > 0$  from the neurons in the ipsilateral region and, (iii) a weak coupling  $I$  from the neurons in  
247 the contralateral side. These three parameters were set as the mean values of, respectively, the  
248 inferred biases  $h_i$  and the inferred ipsilateral and contralateral interactions  $J_{ij}$ . In addition, we  
249 introduce an effective size  $K$  of each region to take into account the fact that mean-field theory  
250 overestimates interactions by replacing them with their mean value. This effective number of neu-  
251 rons was chosen, in practice, to best match the results of the mean-field approach to the full Ising  
252 model predictions (see Appendix 1, Appendix 2 Table 2 and Appendix 2 Figure 7A-C). It was substan-  
253 tially smaller than the number  $N$  of recorded neurons. The selection method used to delineate the  
254 ARTR populations may yield different number of neurons in the  $L$  and  $R$  regions (see Appendix 2  
255 Table 1). This asymmetry was accounted for by allowing the parameters  $H$ ,  $J$  and  $K$  defined above  
256 to take different values for the left and right sides.

257 Mean-field theory thus allowed us to reduce the data-driven Ising model, whose definition re-  
258 quires  $\frac{1}{2}(N_L + N_R)(N_L + N_R + 1)$  parameters  $\{h_i, J_{ij}\}$ , to a model depending on seven parameters  
259 ( $H_L, H_R, J_L, J_R, K_L, K_R, I$ ) only (Figure 4A), whose values vary with the animal and the experimental  
260 conditions e.g. temperature (Appendix 2 Table 2).

## 261 Free energy and Langevin dynamics

262 The main outcome of the analytical treatment of the model is the derivation of the so-called free  
263 energy  $\mathcal{F}(m_L, m_R)$  as a function of the average activities  $m_L$  and  $m_R$ , see Appendix 1. The free energy  
264 is a fundamental quantity as it controls the density of probability to observe an activation pattern  
265  $(m_L, m_R)$  through

$$P(m_L, m_R) \propto e^{-\mathcal{F}(m_L, m_R)} \quad (2)$$

266 Consequently, the lower the free energy  $\mathcal{F}$ , the higher the probability of the corresponding state  
267  $(m_L, m_R)$ . In particular, the minima of the free energy define persistent states of activity in which  
268 the network can be transiently trapped.

269 The free energy landscape can be used to simulate dynamical trajectories in the activity space  
270  $(m_L, m_R)$ . To do so, we consider a Langevin dynamics in which the two activities  $m_L(t), m_R(t)$  evolve  
271 in time according to the stochastic differential equations,

$$\tau \frac{dm_L}{dt}(t) = -\frac{\partial \mathcal{F}}{\partial m_L}(m_L(t), m_R(t)) + \epsilon_L(t), \quad (3)$$

$$\tau \frac{dm_R}{dt}(t) = -\frac{\partial \mathcal{F}}{\partial m_R}(m_L(t), m_R(t)) + \epsilon_R(t), \quad (4)$$

272 where  $\tau$  is a microscopic time scale, and  $\epsilon_L(t), \epsilon_R(t)$  are white noise ‘forces’,  $\langle \epsilon_L(t) \rangle = \langle \epsilon_R(t) \rangle = 0$ ,  
273 independent and delta-correlated in time:  $\langle \epsilon_L(t) \epsilon_R(t') \rangle = 0$ ,  $\langle \epsilon_L(t) \epsilon_L(t') \rangle = \langle \epsilon_R(t) \epsilon_R(t') \rangle = 2 \delta(t - t')$ .  
274 This Langevin dynamical process ensures that all activity configurations  $(m_L, m_R)$  will be sampled in  
275 the course of time, with the expected probability as given by Eq. 2.

276 Figure 4B shows the mean-field simulated dynamics of the left and right activities,  $m_L$  and  $m_R$ ,  
277 with the parameters corresponding to two Ising models at two different temperatures in Figure

278 2C. We observe, at low temperatures, transient periods of self-sustained activity (denoted by  $m^{high}$ )  
279 of one subcircuit, while the other has low activity ( $m^{low}$ ), see time trace 1 in Figure 4B. At high  
280 temperature, high activity in either (left or right) area can be reached only transiently, see trace 2  
281 in Figure 4B. These time traces are qualitatively similar to the ones obtained with the full inferred  
282 Ising model and in the data (Figures 2C and 2A, bottom).

### 283 Barriers in the free-energy landscape and dynamical paths between states

284 We show in Figure 4C the free-energy landscape in the  $(m_L, m_R)$  plane for the same two conditions  
285 as in Figure 4B. The minimization conditions  $\frac{\partial \mathcal{F}}{\partial m_L} = \frac{\partial \mathcal{F}}{\partial m_R} = 0$  provide two implicit equations over  
286 the activities  $m_L^*, m_R^*$  corresponding to the preferred states. For most datasets we found four local  
287 minima: the low-activity minimum  $(m_L^*, m_R^*) = (m^{low}, m^{low})$ , two asymmetric minima,  $(m^{high}, m^{low})$  and  
288  $(m^{low}, m^{high})$ , in which only one subregion is strongly active, and a state in which both regions are  
289 active,  $(m^{high}, m^{high})$ . The low-activity minimum  $(m^{low}, m^{low})$  is the state of lowest free energy, hence  
290 with largest probability, while the high-activity state  $(m^{high}, m^{high})$  has a much higher free energy and  
291 much lower probability. The free energies of the asymmetric minima  $(m^{high}, m^{low})$  and  $(m^{low}, m^{high})$   
292 lie in between, and their values strongly vary with the temperature.

293 The Langevin dynamics defines the most likely paths (see Methods) in the activity plane joining  
294 one preferred state to another, e.g. from  $(m^{high}, m^{low})$  to  $(m^{low}, m^{high})$  as shown in Figure 4C. Along  
295 these optimal paths the free energy  $\mathcal{F}$  reaches local maxima, defining barriers to be overcome in  
296 order for the network to dynamically switchover (purple and green arrows in Figure 4C). The theory  
297 of activated processes stipulates that the average time to cross a barrier depends exponentially  
298 on its height  $\Delta \mathcal{F}$ :

$$t(\Delta \mathcal{F}) \sim \tau \times e^{\Delta \mathcal{F}}, \quad (5)$$

299 up to proportionality factors of the order of unity (**Langer, 1969**). Thus, the barrier  $\Delta \mathcal{F}((m^{high}, m^{low}) \rightarrow$   
300  $(m^{low}, m^{low}))$  shown in dark green in Figure 4D controls the time needed for the ARTR to escape the  
301 state in which the left region is active while the right region is mostly silent, and to reach the all-low  
302 state. The barrier  $\Delta \mathcal{F}((m^{low}, m^{low}) \rightarrow (m^{high}, m^{low}))$  shown in purple is related to the rising time from  
303 the low-low activity state to the state where the right region is active, and the left one is silent.

304 Within mean-field theory, we estimated the dependence in temperature of these barriers height  
305 (Figure 4E and Appendix 2 Figure 7D) and of the associated persistence times (Figure 4F). While sub-  
306 stantial variations from animal to animal were observed, we found that barriers for escaping the  
307 all-low state and switching to either  $L, R$  region increase with the water temperature. As a conse-  
308 quence, at high temperature, only the low-low activity state is accessible in practice to the system,  
309 and the mean activity remains low, see Appendix 2 Figure 2D, with fluctuations within the low-low  
310 state. Conversely, at low water temperatures, barriers separating the low-low and the active high-  
311 low or low-high states are weaker, so the latter become accessible. As a first consequence, the  
312 mean activity is higher at low temperature (Appendix 2 Figure 2D). Furthermore, the system re-  
313 mains trapped for some time in such an active state before switching to the other side, e.g. from  
314 high-low to low-high. This is the origin of the longer persistence time observed at low temperature.

### 315 **Ising and mean-field models with modified biases capture the ARTR visually-driven** 316 **dynamics**

317 While the analysis above focused on the spontaneous dynamics of the ARTR, our data-driven ap-  
318 proach is also capable of explaining activity changes induced by external and time-varying inputs.  
319 In order to illustrate this capacity, we decided to re-analyze a series of experiments, reported in  
320 **Wolf et al. (2017)**, in which we alternatively illuminated the left and right eye of the larva, for periods  
321 of 15 to 30 s, while monitoring the activity of the ARTR (Figure 5A) with a 2-photon light-sheet mi-  
322 croscope. During and after each stimulation protocol, 855 s of spontaneous activity was recorded  
323 on  $n = 6$  fish. We found that the ARTR activity could be driven by this alternating unilateral visual  
324 stimulation: the right side of the ARTR tended to activate when the right eye was stimulated and  
325 vice-versa (Figure 5B).

326 To analyze these datasets we first followed the approach described in Figure 2B, and inferred,  
327 for each fish, the sets of biases  $h_i$  and interactions  $J_{ij}$  using the spontaneous activity recording only.  
328 In a second step, we exploited recordings of the visually-driven activity to infer additional biases  $\delta h_i$   
329 to the neurons, while keeping the interactions  $J_{ij}$  fixed (Figure 5C); in practice we defined two sets of  
330 additional biases,  $\delta \bar{h}_i$  and  $\delta \tilde{h}_i$ , corresponding, respectively, to leftward and rightward illuminations.  
331 The underlying intuition is that biases encode inputs due to the stimulation, while the interactions  
332 between neurons can be considered as fixed over the experimental time scale. This simplified  
333 model reproduces the low order statistics of the data under stimulation (Appendix 2 Figure 8A-B).

334 The inferred values of the additional biases, averaged over the entire sub-population (right or  
335 left), are shown in Figure 5D for both ipsiversive or contraversive stimulation. The results show  
336 that light stimulation produces a strong increase of excitability for the ipsilateral neurons and a  
337 smaller one for contralateral neurons.

338 We then simulated the visual stimulation protocol by sampling the Ising model while alternating  
339 the model parameters, from  $\{h_i + \delta \bar{h}_i, J_{ij}\}$  to  $\{h_i + \delta \tilde{h}_i, J_{ij}\}$ , and back. The simulated dynamics of  
340 the model (Figure 5E) qualitatively reproduces the experimental traces of the ARTR activity (Figure  
341 5B). In particular, the model captures the stabilizing effect of unilateral visual stimuli, which results  
342 in a large activation of the ipsilateral population, which in turn silences the contralateral subcircuit  
343 due to the negative  $I$  coupling between both. This yields the anti-correlation between the left and  
344 right sides clearly visible in both the experimental and simulated traces, and much stronger in the  
345 case of spontaneous activity (Appendix 2 Figure 8C to F).

346 To better understand the Ising dynamics under visual stimulation we resort, as previously, to  
347 mean-field theory. For asymmetric stimulation our mean-field model includes, during the periods  
348 of stimulation, extra biases  $\Delta H_L$  and  $\Delta H_R$  over neurons in, respectively, the left and right areas  
349 (Figure 5C), while the couplings  $J$  and  $I$  remain unchanged. We show in Figure 5F the free-energy  
350  $\mathcal{F}$  as a function of  $m_L, m_R$  for an example fish. Due to the presence of the extra bias the landscape is  
351 tilted with respect to its no-stimulation counterpart (Figure 5G), entailing that the left- or right-active  
352 states are much more likely, and the barrier separating them from the low-low state is much lower.  
353 As a consequence, the time necessary for reaching the high-activity state is considerably reduced  
354 with respect to the no-stimulation case, see Eq. 5. These results agree with the large probability  
355 of the high-activity states and the fast rise to reach these states in the Ising traces in Figure 5E,  
356 compare with Figure 2C.

## 357 Discussion

358 Modelling high-dimensional data, such as extensive neural recordings, imposes a trade-off be-  
359 tween accuracy and interpretability. Although highly sophisticated machine-learning methods may  
360 offer quantitative and detailed predictions, they might in turn prove inadequate to elucidate fun-  
361 damental neurobiological mechanisms. Here we introduced a data-driven network model, whose  
362 biologically-grounded architecture and relative simplicity make it both quantitatively accurate and  
363 amenable to detailed mathematical analysis. We implemented this approach on functional record-  
364 ings performed at various temperature of a key population of neurons in the zebrafish larvae brain,  
365 called ARTR, that drives the orientation of tail bouts and gaze (Dunn et al., 2016; Wolf et al., 2017;  
366 Ramirez and Aksay, 2021; Leyden et al., 2021).

367 First, we demonstrate that the persistent time-scale of the ARTR endogenous dynamics de-  
368 creases with the temperature, mirroring the thermal modulation of turn direction persistence in  
369 freely-swimming behavioral assays. We then demonstrate that our energy-based model not only  
370 captures the statistics of the different activity patterns, but also numerically reproduces the en-  
371 dogenous pseudo-oscillatory network dynamics, and their thermal dependence. The inferred Ising  
372 model is then analyzed within the so-called mean-field formulation, in which the coupling and bias  
373 parameters are replaced by their values averaged over the left and right subpopulations. It yields a  
374 two-dimensional representation of the network energy landscape where the preferred states and  
375 associated activation barriers can be easily evaluated. We show how this combined data-driven



376 and theoretical approach can be applied to analyze the ARTR response to transient visual stimula-  
377 tion. The latter tilts the energy landscape, strongly favoring some states over others.

### 378 **Origin and functional significance of the temperature dependence of the ARTR dy-** 379 **namics**

380 The brains of cold-blooded animals need to operate within the range of temperature that they ex-  
381 perience in their natural habitat, e.g. 18–33°C for zebrafish (*Gau et al., 2013*). This is a peculiarly  
382 stringent requirement since most biophysical processes are dependent on the temperature. In  
383 some rare instances, regulation mechanisms might stabilize the circuit dynamics in order to pre-  
384 serve its function, as best exemplified by the pyloric rhythm of the crab whose characteristic phase  
385 relationship is maintained over an extended temperature range (*Tang et al., 2010*). Yet in general,  
386 an increase in temperature tends to increase the frequency of oscillatory processes (*Robertson and*  
387 *Money, 2012*). The observed acceleration of the ARTR left/right alternation with increasing temper-  
388 ature, could thus directly result from temperature-dependent cellular mechanisms. Furthermore,  
389 one cannot rule out the possibility that the ARTR dynamics could also be indirectly modulated by  
390 temperature via thermal-dependent descending neuromodulatory inputs.

391 As a result of this thermal modulation of the neuronal dynamics, many cold-blooded animals  
392 also exhibit temperature-dependence of their behavior (*Long and Fee, 2008; Neumeister et al.,*  
393 *2000; Stevenson and Josephson, 1990*). Here we were able to quantitatively relate the two pro-  
394 cesses (neuronal and motor) by demonstrating that an increase in temperature consistently alters  
395 the pattern of spontaneous navigation by increasing the left/right alternation frequency. Interpret-  
396 ing the functional relevance of this modification of the swimming pattern is tricky, since many other  
397 features of the animal’s navigation are concurrently impacted by a change in temperature, such  
398 as the bout frequency, turning rate, turn amplitude, etc. Nevertheless, we were able to show in a  
399 recent study that this thermal dependence of the swimming kinematic endows the larva with basic  
400 thermophobic capacity, thus efficiently protecting them from exposure to the hottest regions of  
401 their environment (*Le Goc et al., 2021*).

### 402 **Ising model is not trained to reproduce short-term temporal correlations, but is** 403 **able to predict long-term dynamics**

404 The graphical model we introduced in this work was trained to capture the low-order statistics of  
405 snapshots of activity. Because graphical models are blind to the dynamical nature of the popu-  
406 lation activity, it is generally believed that they cannot reproduce any dynamical feature. Never-  
407 theless, here we demonstrate that our model can quantitatively replicate aspects of the network  
408 long-term dynamics such as the slow alternation between the two preferred states. To better un-  
409 derstand this apparent paradox, it is necessary to distinguish short and long time scales. At short  
410 time scale, defined here as the duration of a time bin (of the order of a few 100 ms), the model  
411 cannot capture any meaningful dynamics. The Monte Carlo algorithm we used to generate activity  
412 is an abstract and arbitrary process, and the correlations it produces between successive time bins  
413 can not reproduce the ones in the recording data. Capturing the short-term dynamics would re-  
414 quire a biologically-grounded model of the cell-cell interactions, or, at the very least, to introduce  
415 parameters capturing the experimental temporal correlations over this short time scale (*Marre*  
416 *et al., 2009; Mézard and Sakellariou, 2011*).

417 Yet, the inability of the Ising model to reproduce short time dynamical correlations does not  
418 hinder its capacity to predict long-time behavior. The separation between individual neuronal pro-  
419 cesses (taking place over time scales smaller than 100 ms) and network-scale activity modulation,  
420 which happens on time scales ranging from 1 to 20 s is here essential. The weak dependence of  
421 macroscopic processes on microscopic details is in fact well known in many fields outside neuro-  
422 science. A classical example is provided by chemical reactions, whose kinetics are often controlled  
423 by a slow step due to the formation of the activated complex and to the crossing of the associated  
424 energy barrier  $\Delta E$ , requiring a time proportional to  $e^{\Delta E/(kT)}$ . All fast processes, whose modelling

425 can be very complex, contribute an effective microscopic time scale  $\tau$  in Arrhenius' expression for  
426 the reaction time, see Eq. 5. In this respect, what really matters to predict long time dynamical  
427 properties is a good estimate of  $\Delta E$ , or, equivalently, of the effective energy landscape felt by the  
428 system. This is precisely what the Ising model is capable of doing. This explains why, even if tempo-  
429 ral information are not explicitly included in the training process, our model may still be endowed  
430 with a predictive power over the long-term network dynamics.

### 431 **Energy-landscape-based mechanism for persistence**

432 In a preceding article (*Wolf et al., 2017*), we developed a mathematical model of the ARTR in which  
433 the left and right ARTR population were represented by a single unit. To account for the ARTR  
434 persistent dynamics, an intrinsic adaptation time-scale had to be introduced in an ad-hoc fashion.  
435 While the mean-field version of the inferred Ising model shows some formal mathematical similar-  
436 ity with this two-unit model, it differs in a fundamental aspect. Here, the slow dynamics reflects  
437 the itinerant exploration of a two-dimensional energy landscape (Figure 4C), for which the barriers  
438 separating metastable states scale linearly with the system size. The time to cross these barriers in  
439 turn grows exponentially with the system size, as prescribed by Arrhenius law, and can be orders  
440 of magnitude larger than any single-neuron relaxation time. Persistence is therefore an emerging  
441 property of the neural network.

### 442 **Mean-field approximation and beyond**

443 The mean-field approach, through a drastic simplification of the Ising model, allows us to unveil  
444 the fundamental network features controlling its coarse-grained dynamics. Within this approxima-  
445 tion, the distributions of couplings and of biases are replaced by their average values. The hetero-  
446 geneities characterizing the Ising model parameters (Appendix 2 Figure 4 and Appendix 2 Figure  
447 5), and ignored in the mean-field approach, may however play an important role in the network  
448 dynamics.

449 In the Ising model, the ipsilateral couplings are found to be broadly distributed such as to pos-  
450 sess both negative and positive values. This leads to the presence of so-called frustrated loops,  
451 that is, chains of neurons along which the product of the pairwise couplings is negative. The states  
452 of activities of the neurons along such loops cannot be set in a way that satisfies all the excitatory  
453 and inhibitory connections, hence giving rise to dynamical instabilities in the states of the neurons.  
454 The absence of frustrated loops in the network (Figure 4A) stabilizes and boosts the activity, an  
455 artifact we had to correct for in our analytical treatment by introducing an effective number of  
456 neurons  $K$ , much smaller than the total numbers of neurons  $N$ s. Neglecting the variability of the  
457 contralateral couplings also constitutes a drastic approximation of the mean field approach. This  
458 is all the more true that the average contralateral coupling  $I$  happens to be small compared to its  
459 standard deviation.

460 Couplings are not only broadly distributed but also spatially organized. Ipsilateral couplings  $J_{ij}$   
461 decay with the distance between neurons  $i$  and  $j$  (Appendix 2 Figure 4F). Similarly, contralateral cou-  
462 plings show strong correlations for short distances between the contralateral neurons (Appendix  
463 2 Figure 4G). The existence of a local spatial organization in the couplings is not unheard of in  
464 computational neuroscience, and can have important functional consequences. It is for instance  
465 at the basis of ring-like attractor models and their extensions to 2 or 3 dimensions (*Tsodyks and*  
466 *Sejnowski, 1995*). Combined with the presence of variable biases  $h_i$ , short-range interactions can  
467 lead to complex propagation phenomena, intensively studied in statistical physics in the context of  
468 the Random Field Ising Model. (*Schneider and Pytte, 1977; Kaufman et al., 1986*). As the most ex-  
469 citable neurons (with the largest biases) fire they excite their neighbors, who in turn become active,  
470 triggering the activation of other neurons in their neighborhood. Such an avalanche mechanism  
471 could explain the fast rise of activity in the left or right region, from low- to high-activity state.

## 472 **Interpretation of the functional connectivity**

473 The inferred functional couplings  $J_{ij}$ 's are not expected to directly reflect the corresponding struc-  
474 tural (synaptic) connectivity. However, their spatial distribution appears to be in line with the known  
475 ARTR organization (Dunn et al., 2016; Kinkhabwala et al., 2011) characterized by large positive (excitatory)  
476 interactions within the left and right population, and by the presence of negative (inhibitory)  
477 contralateral interactions. Although the contralateral couplings are found to be, on average, almost  
478 null, compared to the ipsilateral excitatory counterparts, they drive a subtle interplay between the  
479 left and right regions of the ARTR.

480 Our neural recordings demonstrate a systematic modulation of the ARTR dynamics with the  
481 water temperature, in quantitative agreement with the thermal-dependance of the exploratory  
482 behavior in freely-swimming assays. The model correctly captures this thermal modulation of the  
483 ARTR activity, and in particular the decay of the persistence time with the temperature. This owes  
484 to a progressive change in the values of both the couplings and the biases, which together de-  
485 form the energy landscape and modulate the energy barriers between metastable states. The fact  
486 that the inferred functional connectivity between neurons does not display simple temperature-  
487 dependence is not unexpected as different membrane currents can have different temperature  
488 dependence (Partridge and Connor, 1978).

489 In addition, as shown in Appendix 2 Table 2, the inferred parameters largely vary across datasets.  
490 This variability is partially due to the difficulty to separately infer the interactions  $J_{ij}$  and the biases  
491  $h_i$ , a phenomenon not specific to graphical model but also found with other neural e.g. Integrate-  
492 and-Fire network models (Monasson and Cocco, 2011). This issue can be easily understood within  
493 mean-field theory. For simplicity let us neglect the weak contralateral coupling  $I$ . The mean ac-  
494 tivity  $m$  of a neuron then depends on the total 'input'  $J m + H$  it receives, which is the sum of the  
495 bias  $H$  and of the mean ipsilateral activity  $m$ , weighted by the recurrent coupling  $J$ . Hence, the  
496 combination  $J m + H$  is more robustly inferred than  $H$  and  $J$  taken separately (Appendix 2 Figure  
497 7E).

498 The capacity to quantitatively capture subtle differences in the spontaneous activity induced by  
499 external cues is an important asset of our model. Recent studies have shown that spontaneous be-  
500 havior in zebrafish larvae is not time-invariant but exhibits transitions between different regimes,  
501 lasting over minutes and associated with specific brain-states. These transitions can have no ap-  
502 parent cause (Le Goc et al., 2021) or be induced by external (e.g. stimuli (Andalman et al., 2019)) or  
503 internal cues (e.g. hunger states (Marques et al., 2019)). Although they engage brain-wide changes  
504 in the pattern of spontaneous neural dynamics, they are often triggered by the activation of neuro-  
505 modulatory centers such as the habenula-dorsal raphe nucleus circuit (Corradi and Filosa, 2021).  
506 Training Ising models in various conditions may help decipher how such neuromodulation impacts  
507 the network functional couplings leading to distinct dynamical regimes of spontaneous activity.

## 508 **Data-driven modelling and metastability**

509 With its slow alternating activity and relatively simple architecture, the ARTR offers an ideally suited  
510 circuit to test the capacity of Ising models to capture network-driven dynamics. The possibility to ex-  
511 perimentally modulate the ARTR persistence time-scale further enabled us to evaluate the model  
512 ability to quantitatively represent this slow process. The ARTR is part of a widely distributed hind-  
513 brain network that controls the eye horizontal saccadic movements, and which includes several  
514 other neuronal populations whose activity is tuned to the eye velocity or position (Joshua and Lis-  
515 berger, 2015; Wolf et al., 2017). A possible extension of the model would consist in incorporating  
516 these nuclei in order to obtain a more complete representation of the oculomotor circuit. Beyond  
517 this particular functional network, a similar data-driven approach could be implemented to cap-  
518 ture the slow concerted dynamics that characterize numerous neural assemblies in the zebrafish  
519 brain (van der Plas et al., 2021).

520 The importance of metastable states in cortical activity in mammals has been emphasized in  
521 previous studies as a possible basis for sequence-based computation (Harvey et al., 2012; Brinkman

522 *et al., 2022*). Our model suggests that these metastable states are shaped by the connectivity of  
523 the network, and are naturally explored during ongoing spontaneous activity. In this respect, the  
524 modification of the landscape resulting from visual stimulation, leading to a sharp decrease in the  
525 barrier separating the states is reminiscent of the acceleration of sensory coding reported in *Maz-*  
526 *zucato et al. (2019)*. Our principled data-driven modeling could be useful to assess the generality  
527 of such metastable-state-based computations and of their modulation by sensory inputs in other  
528 organisms.

## 529 **Methods and Materials**

530 All data and new codes necessary to reproduce the results reported in this work can be accessed  
531 from (<https://hub.bio.ens.psl.eu/index.php/s/aMD6e7PsiRZ2pdM>).

## 532 **Key Ressources table**

| Reagent type (species) or resource      | Designation                       | Source or reference                                                                     | Identifiers | Additional information |
|-----------------------------------------|-----------------------------------|-----------------------------------------------------------------------------------------|-------------|------------------------|
| strain, strain background (Danio rerio) | Tg(elav13:H2B-GCaMP6s)            | Vladimirov et al. (2014)                                                                |             |                        |
| strain, strain background (Danio rerio) | Tg(elav13:H2B-GCaMP6f)            | Quirin et al. (2016)                                                                    |             |                        |
| Software, algorithm                     | Blind Sparse Deconvolution        | Tubiana,Wolf, Panier,Debre geas (2020)                                                  | BSD         |                        |
| Software, algorithm                     | Computational Morphometry Toolkit | <a href="https://www.nitrc.org/projects/cmtk/">https://www.nitrc.org/projects/cmtk/</a> | CMTK        |                        |
| Software, algorithm                     | Adaptive Cluster Expansion        | Barton, Cocco, 2013                                                                     | ACE         |                        |

533

## 534 **Zebrafish lines and maintenance**

535 All animals subjects were Zebrafish (*Danio rerio*), aged 5 to 7 days post-fertilization (dpf). Larvae  
536 were reared in Petri dishes in embryo medium (E3) on a 14/10h light/dark cycle at 28°C, and were  
537 fed powdered nursery food (GM75) every day from 6dpf.

538 Calcium imaging experiments were conducted on *nacre* mutants that were expressing either  
539 the calcium indicator GCaMP6f (12 fish) or GCaMP6s (1 fish) in the nucleus under the control of the  
540 nearly pan-neuronal promoter *Tg(elav13:H2B-GCaMP6)*. Both lines were provided by Misha Ahrens  
541 and published in *Vladimirov et al. (2014)* (H2B-GCaMP6s) and *Quirin et al. (2016)* (H2B-GCaMP6f).

542 All experiments were approved by Le Comité d'Éthique pour l'Expérimentation Animale Charles  
543 Darwin (02601.01).

## 544 **Behavioral assays**

545 The behavioral experiments and pre-processing have been described in details elsewhere (*Le Goc*  
546 *et al., 2021*). Shortly, it consists in a metallic pool regulated in temperature with two Peltier el-  
547 ements, recorded in uniform white light from above at 25Hz. Batch of 10 animals experienced  
548 30min in water at either 18, 22, 26, 30 or 33°C (10 batches of 10 fish, involving 170 different individ-  
549 uals, were used). Movies were tracked with FastTrack (*Gallois and Candelier, 2021*), and MATLAB  
550 (The Mathworks) is used to detect discrete swim bouts from which the differences of orientation  
551 between two consecutive events are computed, referred to as turn or reorientation angles  $\delta\theta$ .

552 Turn angles distributions could be fitted as the sum of two distributions (Gaussian and Gamma),  
553 whose intersection was used to define an angular threshold to categorize events into forward (F),  
554 left turn (L) or right turn (R, Figure 1E). This threshold was found to be close to 10 degrees for all  
555 tested temperatures.

556 Then we ternarized  $\delta\theta$  values, based on F, L or R classification (Figure 1F) and computed the  
557 power spectrum of the binary signals defined from symbols L and R only, with the periodogram  
558 MATLAB function and averaged by temperature (Figure 1G). The outcome was fitted to the Lorentzian  
559 expression corresponding to a memory-less equiprobable two-state process (*Odde and Buettner,*  
560 *1998*):

$$S(f) \propto \frac{2k_{flip}}{4k_{flip}^2 + (2\pi f)^2}, \quad (6)$$

561 where  $k_{flip}$  is the rate of transition from one state to another. The inverse of the fitted flipping rate  
562  $k_{flip}$  represents the typical time spent in the same orientational state, i.e. the typical time taken to  
563 switch turning direction.

### 564 **Light-sheet functional imaging of spontaneous activity**

565 Volumetric functional recordings were carried out using custom-made one-photon light-sheet mi-  
566 croscopes whose optical characteristics have been detailed elsewhere (*Panier et al., 2013*). Larvae  
567 were mounted in a 1mm diameter cylinder of low melting point agarose at 2% concentration.

568 Imaged volume corresponded to  $122 \pm 46 \mu\text{m}$  in thickness, split into  $16 \pm 4$  slices (mean  $\pm$  s.d.).  
569 Recordings were of length  $1392 \pm 256$  seconds with a brain volume imaging frequency of  $6 \pm 2$  Hz  
570 (mean  $\pm$  s.d.).

571 Image pre-processing, neurons segmentation and calcium transient ( $\Delta F/F$ ) extraction were  
572 performed offline using MATLAB, according to the workflow previously reported (*Panier et al.,*  
573 *2013; Wolf et al., 2017; Migault et al., 2018*).

574 A Peltier module is attached to the lower part of the pool (made of tin) with thermal tape  
575 (3M). A type T thermocouple (Omega) is placed near the fish head ( $< 5\text{mm}$ ) to record the fish  
576 surrounding temperature. The signal from a thermocouple amplifier (Adafruit) is used in a PID  
577 loop implemented on an Arduino board, which mitigate the Peltier power to achieve the prede-  
578 fined temperature target, stable at  $\pm 0.5^\circ\text{C}$ . The temperature regulation softwares and electron-  
579 ics design are available on Gitlab under a GNU GPLv3 licence ([https://gitlab.com/GuillaumeLeGoc/](https://gitlab.com/GuillaumeLeGoc/arduino-temperature-control)  
580 [arduino-temperature-control](https://gitlab.com/GuillaumeLeGoc/arduino-temperature-control)).

581 The ARTR neurons were selected using a method described elsewhere (*Wolf et al., 2017*). First,  
582 a group of neurons was manually selected on a given slice based on a morphological criterion such  
583 that the ARTR structure (ipsilateral correlations and contralateral anticorrelation) is revealed. Then,  
584 neurons showing Pearson's correlation (anti-correlation) higher than 0.2 (less than -0.15, respec-  
585 tively) are selected, manually filtering them on a morphological criterion. Those neurons are then  
586 added to the previous ones, whose signals are used to find neurons from the next slice and so on  
587 until all slices are treated.

588 For fish that were recorded at different temperature, to ensure that the same neurons are  
589 selected, we used the Computational Morphometry Toolkit (CMTK, [https://www.nitrc.org/projects/](https://www.nitrc.org/projects/cmtk/)  
590 [cmtk/](https://www.nitrc.org/projects/cmtk/)) to align following recordings onto the first one corresponding to the same individual. Re-  
591 sulting transformations are then applied to convert neurons coordinates in a consistent manner  
592 through all recordings involving the same fish.

### 593 **Visually-driven recordings**

594 Volumetric functional recordings under visual stimulation were carried using our two-photon light-  
595 sheet microscope described in *Wolf et al. (2015)*. The stimulation protocol was previously explained  
596 in *Wolf et al. (2017)*: two LEDs were positioned symmetrically outside of the chamber at  $45^\circ$  and  
597 4.5 cm from the fish eyes, delivering a visual intensity of  $20 \mu\text{W}/\text{cm}^2$ . We alternately illuminated 17  
598 times each eye for 10s, 15s, 20s, 25s and 30s while performing two-photon light-sheet brain-wide  
599 functional imaging. Synchronization between the microscope and the stimulation set-up was done  
600 using a D/A card (NI USB-6259 NCS, National Instruments) and a LabVIEW program. Brain volume  
601 image frequency was of 1Hz on the 6 recorded fish. Recordings last for 4500s, 856s of wich is



602 spontaneous activity. We extracted the ARTR neurons following the same procedure described  
603 above, yielding  $89 \pm 54$  neurons (mean  $\pm$  s.d.).

#### 604 **Time constants definitions**

605 For the flipping rates (Figure 1D), we defined the time-dependent signed activity of the ARTR (Figure  
606 1B) through

$$\sigma(t) = \text{sign}(m_L(t) - m_R(t)), \quad (7)$$

607 where  $m_{L,R}(t) = \frac{1}{N_{L,R}} \sum_{i \in L,R} s_i(t)$  are the average activities in the L,R regions. A power spectrum  
608 density is estimated for each signal with the Thomson's multitaper method through the pmtm  
609 MATLAB function (time-halfbandwidth product set to 4). The power spectrum densities were then  
610 fitted with a Lorentzian spectrum, see Eq. 6 and Figure 1G.

611 ARTR left and right persistence times (Figure 3B) are defined as the time  $m_L$  and  $m_R$  signals spend  
612 consecutively above an arbitrary threshold set at 0.1. Left and right signals are treated altogether.  
613 Changing the threshold does induce a global offset but does not change the observed effect of  
614 temperature, the relation with  $m_L$  and  $m_R$  mean signals, nor the relation with the persistence times  
615 of the synthetic signals. The persistence times of the synthetic signals, generated with the Ising  
616 models, are computed using the same procedure: we compute the time  $m_L$  and  $m_R$  synthetic signals  
617 spend consecutively above an arbitrary threshold set at 0.1, we then normalize these durations by  
618 the corresponding experimental frame rate in order to compare the different recordings (Figure  
619 3B). For the mean-field simulated dynamics of the left and right activities, we also follow the same  
620 strategy in order to compute the persistence times displayed in Figure 4F.

#### 621 **Inference of Ising model from neural activity**

622 From spontaneous activity to spiking data, to biases and connectivity

623 For each recording (animal and/or temperature) approximate spike trains were inferred from the  
624 fluorescence activity signal using the Blind Sparse Deconvolution algorithm (*Tubiana et al., 2020*).  
625 This algorithm features automatic (fully unsupervised) estimation of the hyperparameters, such as  
626 spike amplitude, noise level and rise and decay time constants, but also an automatic thresholding  
627 for binarizing spikes such as to maximize the precision-recall performance. The binarized activity  
628 of the  $N$  recorded neurons was then described for each time bin  $t$ , into a  $N$ -bit binary configuration  
629  $s_t$ , with  $s_i(t) = 1$  if neuron  $i$  is active in bin  $t$ , 0 otherwise.

630 The functional connectivity matrix  $J_{ij}$  and the biases  $h_i$  defining the Ising probability distribution  
631 over neural configurations, see Eq. 1, were determined such that the pairwise correlations and  
632 average activities computed from the model match their experimental counterparts. In practice,  
633 we approximately solved this hard inverse problem using the Adaptive Cluster Expansion and  
634 the Monte-Carlo learning algorithms described in *Cocco and Monasson (2011)* and in *Barton and*  
635 *Cocco (2013)*. The full code of the algorithms can be downloaded from the GitHub repository: <https://github.com/johnbarton/ACE/>.

#### 637 **Monte Carlo sampling**

638 In order to generate synthetic activity, we resorted to Gibbs sampling, a class of Monte Carlo  
639 Markov Chain method, also known as Glauber dynamics. At each time step  $k$ , a neuron, say,  $i$ ,  
640 is picked up uniformly at random, and the value of its activity is updated from  $s_i^k$  to  $s_i^{k+1} = 0, 1$   
641 according to the probability

$$P(s_i^{k+1} | s_{j \neq i}^k) = \frac{\exp(s_i^{k+1}(h_i + \sum_j J_{ij} s_j^k))}{1 + \exp(h_i + \sum_j J_{ij} s_j^k)} \quad (8)$$

642 which depends on the current activities of the other neurons. As this updating fulfills detailed  
643 balance the probability distribution of  $s^k$  eventually converges to  $P$  in Eq. 1. A Monte Carlo round  
644 is defined as the number of Monte Carlo steps divided by the total number of neurons,  $N$ . The

645 code used can be accessed from the link provided at the beginning of the Materials and Methods  
646 section.

#### 647 Cross-validation and independent model

648 We cross-validated the Ising models (see Appendix Figure 3) dividing the data sets in two parts: for  
649 each experiment, 75% of each data set is used as a training set and the remaining 25% is used as  
650 a test set. Each training set is used to infer an Ising model. We then compare the mean activity  
651 and covariance of the test set with the one computed from the simulated data generated by the  
652 models (Appendix 2 Figure 3A-B). We also show the relative variation of the models' log likelihood  
653 computed on the training data and the test data (Appendix 2 Figure 3C).

654 In addition, as a null hypothesis, we decided to compare the Ising models fitted on the data with  
655 the independent model. The independent model depends on the mean activities  $\langle s_i \rangle_{\text{data}}$  only, and  
656 reads

$$P(\mathbf{s}) = \frac{1}{Z} \exp\left(\sum_i h_i s_i\right), \quad (9)$$

657 We demonstrate in Appendix 2 Figure 3E-F the inefficiency of the independent models, comparing  
658 the mean activity and covariance of the test set with the one computed from the simulated data  
659 generated by the independent models. We also show the relative variation, between the Ising and  
660 the independent models, of the log likelihood computed on the training data and the test data  
661 (Appendix 2 Figure 3G).

#### 662 Real data and models comparison

663 To quantify the quality of the log-probability landscapes reproduction by the Ising models (Figure  
664 3A), we used the Kullback-Leibler divergence between (1) a dataset  $i$  and the synthetic signals gen-  
665 erated with the model trained on that dataset  $i$  (green) and (2) the dataset  $i$  with synthetic signals  
666 generated with every other models (red). With  $c_i$  the count in the two-dimensional bin  $i$  ( $10 \times 10$   
667 bins used) and  $\alpha$  a pseudocount (set to 1), the probability in bin  $i$  is defined as  $P_i = \frac{c_i + \alpha}{\sum_j (c_j + \alpha)}$ . The  
668 Kullback-Leibler divergence between a data/model pair is then defined as

$$D_{KL} = \sum_i P_{data,i} \log_{10} \left( \frac{P_{data,i}}{P_{model,i}} \right). \quad (10)$$

669 We follow the exact same procedure in order to compare the independent model and their cor-  
670 responding datasets (Figure 3A in blue). In this case we use synthetic signals generated with the  
671 independent model to define  $P_{model,i}$ .

#### 672 Inference of additional biases from visually-driven activity recordings

673 For the visually-driven activity recordings, we infer the additional biases  $\delta \bar{h}_i$  from the recordings of  
674 the ARTR activity (Figure 5D) during, for example, the leftward light stimulations as follows. Let  $\bar{B}$   
675 the number of time bins  $t = 1, 2, \dots, \bar{B}$  in the recording, and  $s_i$  the corresponding binarized activity  
676 configurations. We define, for each neuron  $i$ ,

$$\rho_i(\delta h) = \sum_{t=1}^{\bar{B}} \frac{\exp(h_i + \sum_j J_{ij} s_j(t) + \delta h)}{1 + \exp(h_i + \sum_j J_{ij} s_j(t) + \delta h)}. \quad (11)$$

677  $\rho_i(\delta h)$  represents the mean activity of neuron  $i$ , when subject to a global bias summing  $h_i$ , the  
678 other neurons activities  $s_j(t)$  weighted by the couplings  $J_{ij}$ , and an additional bias  $\delta h$ , averaged  
679 over all the frames  $t$  corresponding to left-sided light stimulation. It is a monotonously increasing  
680 function of  $\delta h$ , which matches the experimental average activity  $\frac{1}{\bar{B}} \sum_{t=1}^{\bar{B}} s_i(t)$  for a unique value of its  
681 argument. This value defines  $\delta \bar{h}_i$ . The same procedure was followed to infer the additional biases  
682  $\delta \bar{h}_i$  associated to rightward visual stimulations.

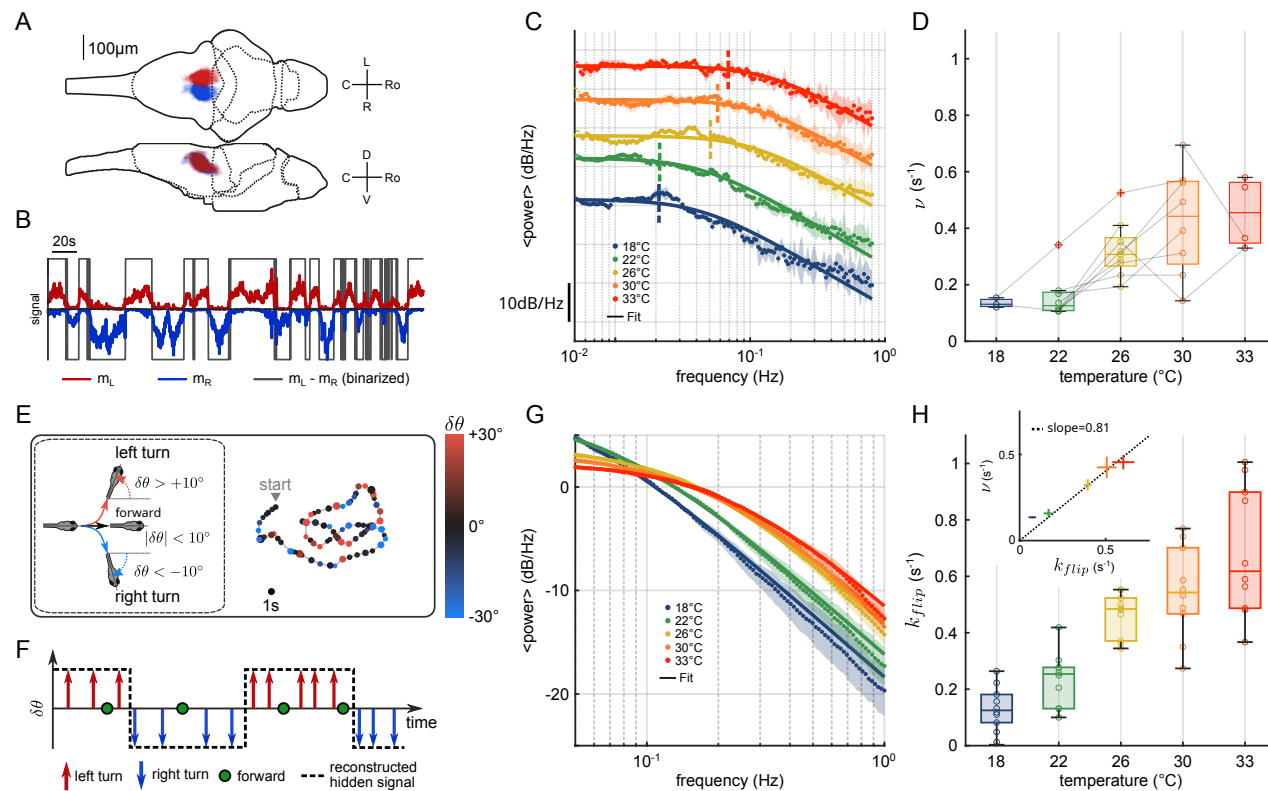

**Figure 1. Temperature-dependence of ARTR dynamics and turn direction persistence.**

**A**, Morphological organization of the ARTR showing all identified neurons from 13 fish recorded with lightsheet calcium imaging. **B**, Example of ARTR binarized signal  $\text{sign}(m_L - m_R)$  (gray) along with the left ( $m_L$ , red) and right ( $m_R$ , blue) mean activities. **C**, Averaged power spectra of the ARTR binarized signals, for the 5 tested temperatures. The dotted vertical lines indicate the signal switching frequencies  $\nu$  as extracted from the Lorentzian fit (solid lines). **D**, Temperature-dependence of  $\nu$ . The lines join data points obtained with the same larva. **E**, Swimming patterns in zebrafish larvae. Swim bouts are categorized into forward and turn bouts, based on the amplitude of the heading reorientation. Example trajectory: each dot corresponds to a swim bout; the color encodes the reorientation angle. **F**, The bouts are discretized as left/forward/right bouts. The continuous binary signal represents the putative orientational state governing the chaining of the turn bouts. **G**, Power spectra of the discretized orientational signal averaged over all animals for each temperature (dots). Each spectrum is fitted by a Lorentzian function (solid lines) from which we extract the switching rate  $k_{flip}$ . **H**, Temperature dependence of  $k_{flip}$ . Inset: relationship between  $k_{flip}$  (behavioral) and  $\nu$  (neuronal) switching frequencies. Bar sizes represent s.e.m. and the dashed line is the linear fit.

## 683 Acknowledgments

684 S.W. acknowledges support by a fellowship from the Fondation pour la Recherche Médicale (SPF  
685 201809007064), and G.L.G. by the Systems Biology network of Sorbonne Université. This project  
686 was in part funded by the Human Frontier Science Program (RGP0060/2017).

687 We thank the IBPS fish facility staff for the fish maintenance, we are grateful to Carounagarane  
688 Dore for his contribution to the design of the experimental setups. We thank Misha Ahrens for  
689 providing the GCaMP line.

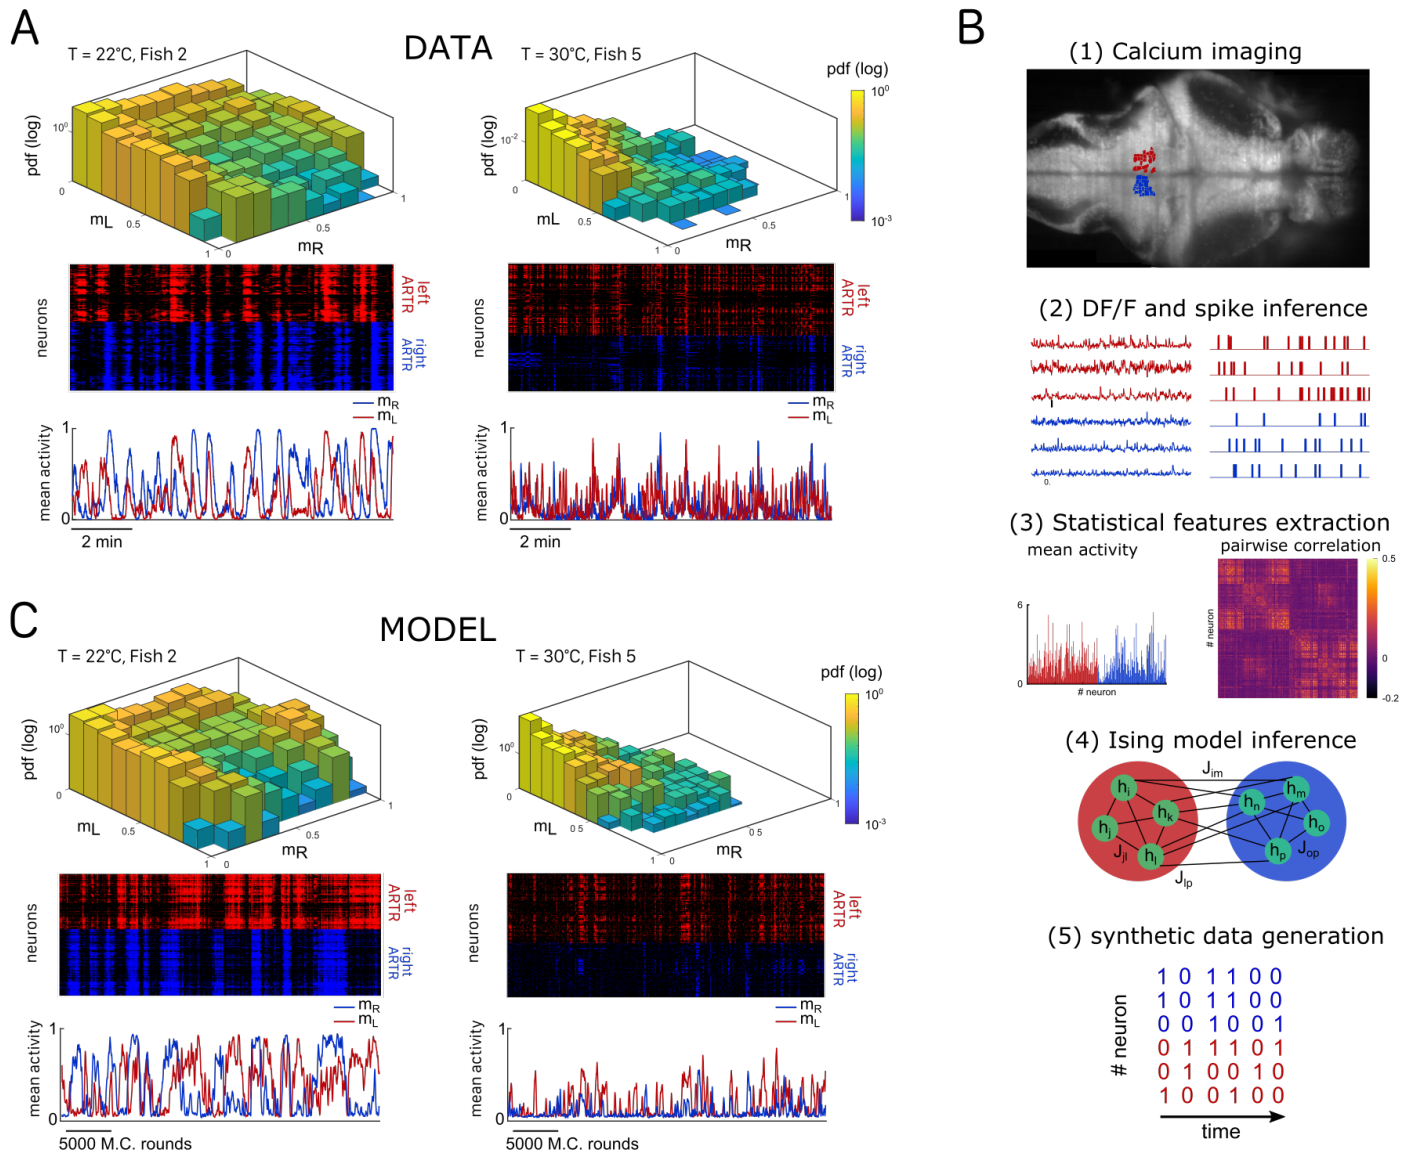

**Figure 2. Ising models reproduce characteristic features of the recorded activity.**

**A**, (Top) Probability densities  $P(m_L, m_R)$ , see Eq. 2, of the activity state of the circuit (obtained from the spiking inference of the calcium data), in logarithmic scale and for two different fish and water temperatures  $T = 22$  and  $T = 30^{\circ}\text{C}$ ; Color encodes z-axis (same color bar for both). (Middle) 10-min long raster plots of the activities of the left (red) and right (blue) subregions of the ARTR. (Bottom) Corresponding time traces of the mean activities  $m_L$  and  $m_R$ . **B**, Processing pipeline for the inference of the Ising model. We first extract from the recorded fluorescence signals approximate spike trains using a Bayesian deconvolution algorithm (BSD). The activity of each neuron is then "0" or "1". We then compute the mean activity and the pairwise covariance of the data, from which we infer the parameters  $h_i$  and  $J_{ij}$  of the Ising model. Finally, we can generate raster plot of activity using Monte-Carlo sampling. **C**, Same as **A** for the two corresponding inferred Ising models. The raster plots correspond to Monte-Carlo-sampled activity, showing slow alternance between periods of high activity in the L/R regions. Here we show only two examples of a qualitative experimental vs synthetic signals comparison. We provide in the supplementary materials the same comparison for every recording.

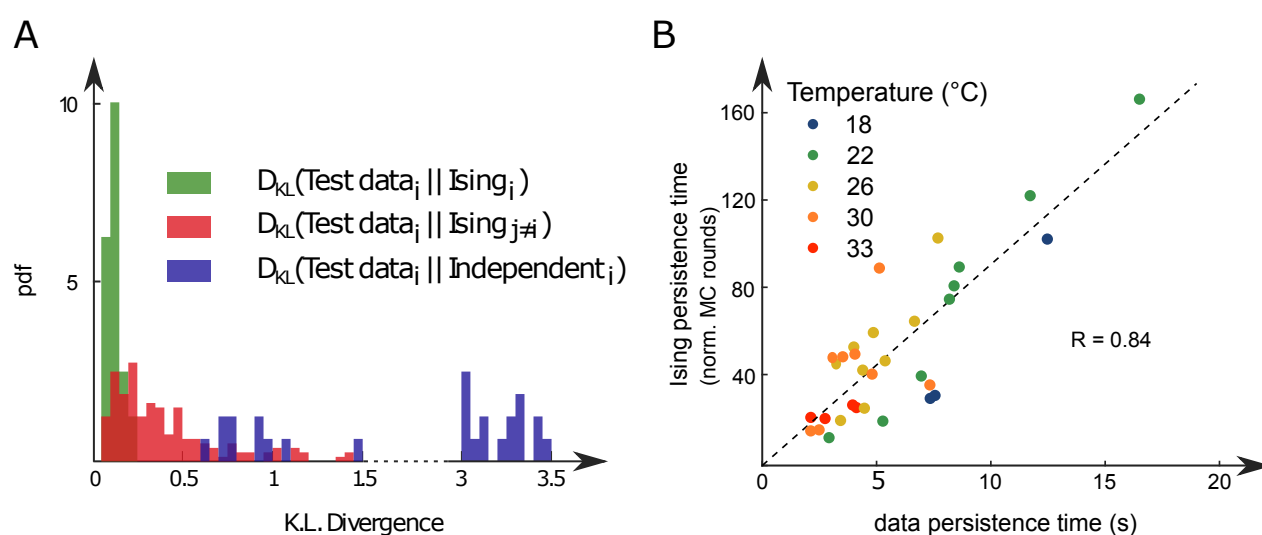

**Figure 3. Comparison of model distributions and persistence times across fish and water temperatures.**

**A**, Distribution of the Kullback-Leibler divergences between test datasets and their corresponding Ising models (green), between test datasets and Ising models trained on different datasets (red) and between test datasets and their corresponding independent models that assume no connections between neurons (dark blue). Note that each dataset is divided in a training set corresponding to 75% of the time bins chosen randomly and a test set comprising the remaining 25%. **B**, Average persistence times in simulations vs. experiments. Each dot refers to one fish at one water temperature, colors encode temperature.



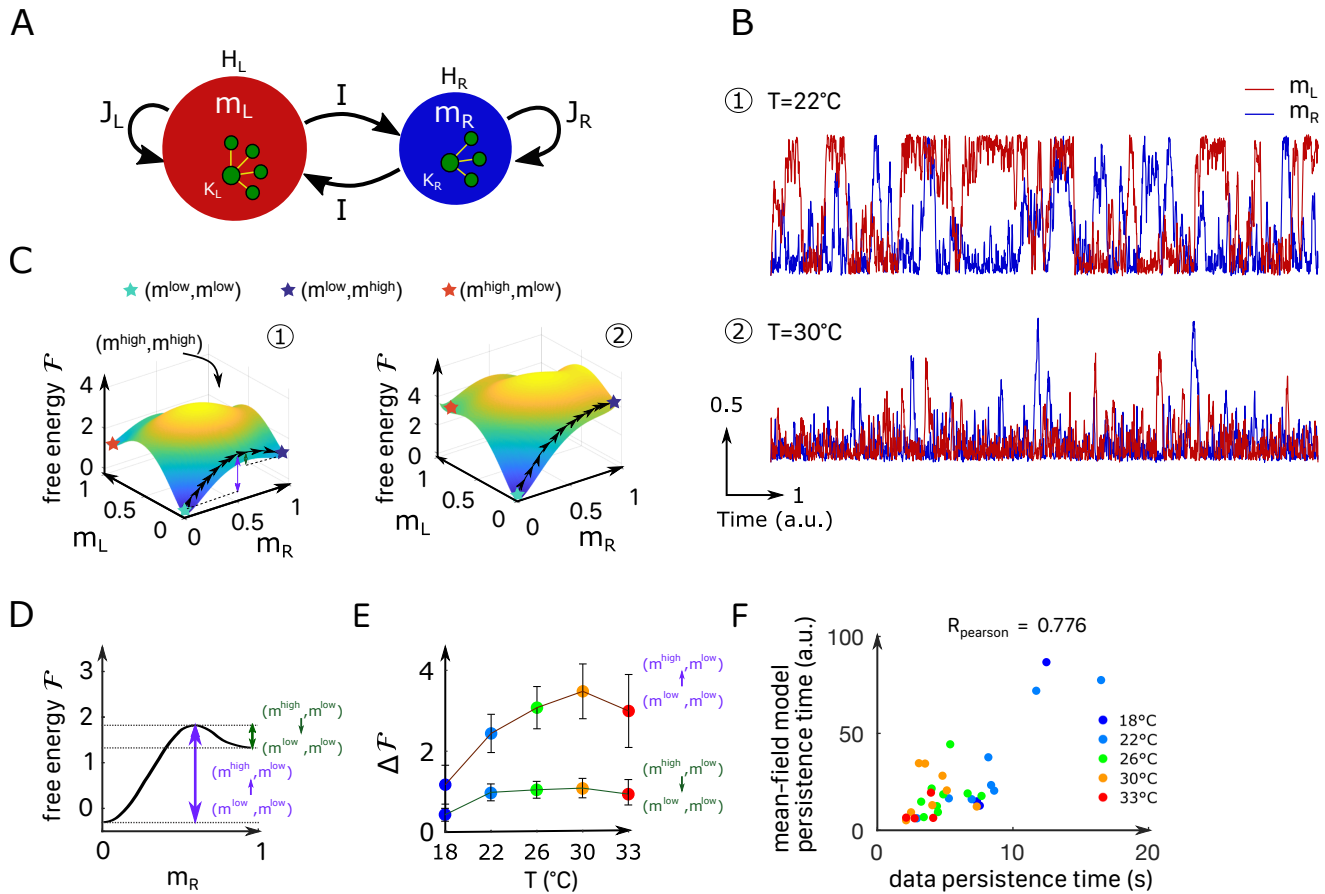

**Figure 4. Mean-field approximation of the inferred Ising model.**

**A**, Schematic view of the mean-field Ising model. **B**, Examples of simulated  $m_L$  and  $m_R$  signals of the mean-field dynamical equations for two sets of parameters that correspond to fish ID 5 at two water temperatures (22°C and 30°C), see Table 1. **C**, Free-energy landscapes in the  $(m_L, m_R)$  plane computed with the mean-field model. These data correspond to the same sets of parameters as in panel B. Colored circles denote metastable states, and the line of black arrows indicates the optimal path between  $(m^{low}, m^{low})$  and  $(m^{low}, m^{high})$  states. **D** Schematic view of the free-energy along the  $m_R$  axes. The arrows denote the energy barriers  $\Delta\mathcal{F}$  associated with the various transitions. The dark green arrow denotes  $\Delta\mathcal{F}((m^{high}, m^{low}) \rightarrow (m^{low}, m^{low}))$ ; the purple arrow denotes  $\Delta\mathcal{F}((m^{low}, m^{low}) \rightarrow (m^{high}, m^{low}))$ . **E**, Values of the free-energy barriers as a function of temperature. Error bars are standard error of the mean. **F**, Persistence time of the mean-field ARTR model for all fish and runs at different experimental temperatures. Each dot refers to one fish at one temperature, colors encode temperature.

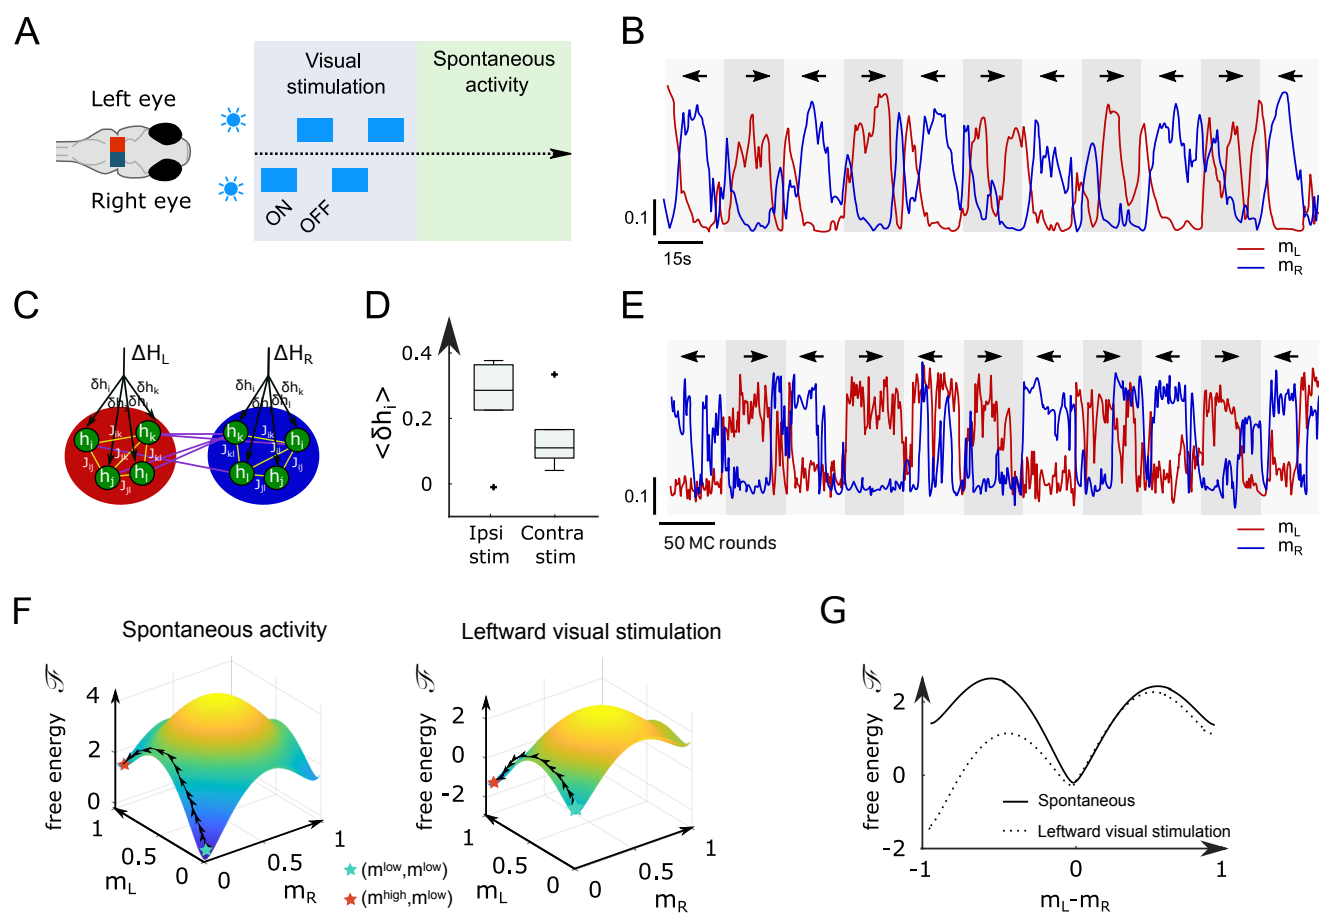

**Figure 5. Modified Ising model captures the behavior of ARTR under visual stimulation.**

**A** Scheme of the stimulation protocol. The left and right eyes are stimulated alternately for periods of 15 to 30s, after which a period of spontaneous (no stimulus) activity is acquired. **B**, Example of the ARTR activity signals under alternated left-right visual stimulation. The small arrows indicate the direction of the stimulus. **C**, Sketch of the modified Ising model, with additional biases  $\delta h_i$  to account for the local visual inputs. **D**, Values of the additional biases averaged over the ipsilateral and contralateral (with respect to the illuminated eye) neural populations. **E**, Monte Carlo activity traces generated with the modified Ising model. **F**, Free-energy landscapes computed with the mean-field theory during spontaneous (left panel) and stimulated (right panel) activity for an example fish. **G**, Free-energy along the optimal path as a function of  $m_L - m_R$  during spontaneous (plain line) and stimulated (dotted line) activity. The model is the same as in panel F.

## References

- 690  
691 Ahrens, M. B., Orger, M. B., Robson, D. N., Li, J. M., and Keller, P. J. (2013). Whole-brain functional imaging at  
692 cellular resolution using light-sheet microscopy. *Nature Methods*, 10(5):413–420.
- 693 Andalman, A. S., Burns, V. M., Lovett-Barron, M., Broxton, M., Poole, B., Yang, S. J., Grosenick, L., Lerner, T. N.,  
694 Chen, R., Benster, T., Mourrain, P., Levoy, M., Rajan, K., and Deisseroth, K. (2019). Neuronal dynamics regu-  
695 lating brain and behavioral state transitions. *Cell*, 177(4):970–985.e20.
- 696 Barton, J. and Cocco, S. (2013). Ising models for neural activity inferred via selective cluster expansion: Structural  
697 and coding properties. *Journal of Statistical Mechanics: Theory and Experiment*, 2013(03):P03002.
- 698 Barton, J., De Leonardis, E., Coucke, A., and Cocco, S. (2016). Ace: adaptive cluster expansion for maximum  
699 entropy graphical model inference. *Bioinformatics*, 32:3089–3097.
- 700 Brinkman, B. A. W., Yan, H., Maffei, A., Park, I. M., Fontanini, A., Wang, J., and Camera, G. L. (2022). Metastable  
701 dynamics of neural circuits and networks. *Applied Physics Review*, 9:011313.
- 702 Butts, D. (2019). Data-driven approaches to understanding visual neuron activity. *Annual Review of Vision Science*,  
703 5:451–477.
- 704 Chen, X., Randi, F., Leifer, A. M., and Bialek, W. (2019). Searching for collective behavior in a small brain. *Phys.*  
705 *Rev. E*, 99:052418.
- 706 Cocco, S., Leibler, S., and Monasson, R. (2009). Neuronal couplings between retinal ganglion  
707 cells inferred by efficient inverse statistical physics methods. *Proceedings of the National*  
708 *Academy of Sciences*, 106(33):14058–14062. Publisher: National Academy of Sciences \_eprint:  
709 <https://www.pnas.org/content/106/33/14058.full.pdf>.
- 710 Cocco, S. and Monasson, R. (2011). Adaptive Cluster Expansion for Inferring Boltzmann Machines with Noisy  
711 Data. *Physical Review Letters*, 106(9):090601.
- 712 Corradi, L. and Filosa, A. (2021). Neuromodulation and behavioral flexibility in larval zebrafish: From neuro-  
713 transmitters to circuits. *Front. Mol. Neurosci.*, 14:718951.
- 714 Dunn, T. W., Mu, Y., Narayan, S., Randlett, O., Naumann, E. A., Yang, C.-T., Schier, A. F., Freeman, J., Engert, F.,  
715 and Ahrens, M. B. (2016). Brain-wide mapping of neural activity controlling zebrafish exploratory locomotion.  
716 *eLife*, 5:e12741.
- 717 Gallois, B. and Candelier, R. (2021). FastTrack: An open-source software for tracking varying numbers of de-  
718 formable objects. *PLoS Computational Biology*, 17(2):e1008697.
- 719 Gau, P., Poon, J., Ufret-Vincenty, C., Snelson, C. D., Gordon, S. E., Raible, D. W., and Dhaka, A. (2013). The  
720 Zebrafish Ortholog of TRPV1 Is Required for Heat-Induced Locomotion. *Journal of Neuroscience*, 33(12):5249–  
721 5260.
- 722 Glaser, J. I., Benjamin, A. S., Chowdhury, R. H., Perich, M. G., Miller, L. E., and Kording, K. P. (2020). Machine  
723 learning for neural decoding. *eNeuro*, 7(4).
- 724 Guo, Z. V., Inagaki, H. K., Daie, K., Druckmann, S., Gerfen, C. R., and Svoboda, K. (2017). Maintenance of persis-  
725 tent activity in a frontal thalamocortical loop. *Nature*, 545(7653):181–186.
- 726 Harvey, C. D., Coen, P., and Tank, D. W. (2012). Choice-specific sequences in parietal cortex during a virtual-  
727 navigation decision task. *Nature*, 484:62–68.
- 728 Jaynes, E. T. (1957). Information theory and statistical mechanics. *Phys. Rev.*, 106:620–630.
- 729 Joshua, M. and Lisberger, S. (2015). A tale of two species: Neural integration in zebrafish and monkeys. *Neuro-*  
730 *science*, 296:80–91.
- 731 Kaufman, M., Klunzinger, P. E., and Khurana, A. (1986). Multicritical points in an ising random-field model.  
732 *Physical Review B*, 34(7):4766.
- 733 Kinkhabwala, A., Riley, M., Koyama, M., Monen, J., Satou, C., Kimura, Y., Higashijima, S.-i., and Fetcho, J. (2011).  
734 A structural and functional ground plan for neurons in the hindbrain of zebrafish. *Proceedings of the National*  
735 *Academy of Sciences*, 108(3):1164–1169.
- 736 Koller, D. and Friedmann, N. (2009). *Probabilistic Graphical Models: Principles and Techniques*. MIT Press.

- 737 Langer, J. (1969). Statistical theory of the decay of metastable states. *Annals of Physics*, 54(2):258–275.
- 738 Le Goc, G., Lafaye, J., Karpenko, S., Bormuth, V., Candelier, R., and Debrégeas, G. (2021). Thermal modulation of  
739 zebrafish exploratory statistics reveals constraints on individual behavioral variability. *BMC Biology*, 19:1–17.
- 740 Leyden, C., Brysch, C., and Arrenberg, A. B. (2021). A distributed saccade-associated network encodes high  
741 velocity conjugate and monocular eye movements in the zebrafish hindbrain. *Scientific reports*, 11(1):1–17.
- 742 Long, M. A. and Fee, M. S. (2008). Using temperature to analyse temporal dynamics in the songbird motor  
743 pathway. *Nature*, 456(7219):189–194.
- 744 Ma, S.-K. (1985). *Statistical Mechanics*. World Scientific.
- 745 Marques, J. C., Li, M., Schaak, D., Robson, D. N., and Li, J. M. (2019). Internal state dynamics shape brainwide  
746 activity and foraging behaviour. *Nature*, 577(7789):239–243.
- 747 Marre, O., El Boustani, S., Frégnac, Y., and Destexhe, A. (2009). Prediction of spatiotemporal patterns of neural  
748 activity from pairwise correlations. *Phys. Rev. Lett.*, 102:138101.
- 749 Mazzucato, L., La Camera, G., and Fontanini, A. (2019). Expectation-induced modulation of metastable activity  
750 underlies faster coding of sensory stimuli. *Nat. Neurosci.*, 22:787–96.
- 751 Meshulam, L., Gauthier, J. L., Brody, C. D., Tank, D. W., and Bialek, W. (2017). Collective Behavior of Place and  
752 Non-place Neurons in the Hippocampal Network. *Neuron*, 96(5):1178–1191.e4.
- 753 Mézard, M. and Sakellariou, J. (2011). Exact mean-field inference in asymmetric kinetic ising systems. *Journal*  
754 *of Statistical Mechanics: Theory and Experiment*, page L07001.
- 755 Migault, G., van der Plas, T. L., Trentesaux, H., Panier, T., Candelier, R., Proville, R., Englitz, B., Debrégeas, G.,  
756 and Bormuth, V. (2018). Whole-Brain Calcium Imaging during Physiological Vestibular Stimulation in Larval  
757 Zebrafish. *Current Biology*, 28(23):3723–3735.e6.
- 758 Miri, A., Daie, K., Arrenberg, A. B., Baier, H., Aksay, E., and Tank, D. W. (2011). Spatial gradients and multidimen-  
759 sional dynamics in a neural integrator circuit. *Nat Neurosci*, 14(9):1150–1159.
- 760 Monasson, R. and Cocco, S. (2011). Fast inference of interactions in assemblies of stochastic integrate-and-fire  
761 neurons from spike recordings. *J. Comput Neurosci.*, 31:199–227.
- 762 Neumeister, H., Ripley, B., Preuss, T., and Gilly, W. (2000). Effects of temperature on escape jetting in the squid  
763 *Loligo opalescens*. *Journal of Experimental Biology*, 203(3):547–557.
- 764 Nghiem, T.-A., Telenczuk, B., Marre, O., Destexhe, A., and Ferrari, U. (2018). Maximum-entropy models reveal  
765 the excitatory and inhibitory correlation structures in cortical neuronal activity. *Phys. Rev. E*, 98:012402.
- 766 Odde, D. J. and Buettner, H. M. (1998). Autocorrelation Function and Power Spectrum of Two-State Random  
767 Processes Used in Neurite Guidance. *Biophysical Journal*, 75(3):1189–1196.
- 768 Pandarinath, C., O’Shea, D., and Collins, J. e. a. (2018). Inferring single-trial neural population dynamics using  
769 sequential auto-encoders. *Nature Methods*, 15:808–815.
- 770 Panier, T., Romano, S. A., Olive, R., Pietri, T., Sumbre, G., Candelier, R., and Debrégeas, G. (2013). Fast functional  
771 imaging of multiple brain regions in intact zebrafish larvae using Selective Plane Illumination Microscopy.  
772 *Frontiers in Neural Circuits*, 7(65).
- 773 Partridge, L. D. and Connor, J. A. (1978). A mechanism for minimizing temperature effects on repetitive firing  
774 frequency. *American Journal of Physiology-Cell Physiology*, 234(5):C155–C161.
- 775 Posani, L., Cocco, S., Ježek, K., and Monasson, R. (2017). Functional connectivity models for decoding of spatial  
776 representations from hippocampal CA1 recordings. *Journal of Computational Neuroscience*, 43(1):17–33.
- 777 Posani, L., Cocco, S., and Monasson, R. (2018). Integration and multiplexing of positional and contextual infor-  
778 mation by the hippocampal network. *PLoS computational biology*, 14(8):e1006320.
- 779 Quirin, S., Vladimirov, N., Yang, C.-T., Peterka, D. S., Yuste, R., and B. Ahrens, M. (2016). Calcium imaging of  
780 neural circuits with extended depth-of-field light-sheet microscopy. *Optics Letters*, 41(5):855.
- 781 Ramirez, A. D. and Aksay, E. R. (2021). Ramp-to-threshold dynamics in a hindbrain population controls the  
782 timing of spontaneous saccades. *Nature communications*, 12(1):1–19.

- 783 Robertson, R. M. and Money, T. G. (2012). Temperature and neuronal circuit function: compensation, tuning  
784 and tolerance. *Current Opinion in Neurobiology*, 22(4):724–734.
- 785 Schneider, T. and Pytte, E. (1977). Random-field instability of the ferromagnetic state. *Physical Review B*,  
786 15(3):1519.
- 787 Schneidman, E., Berry, M. J., Segev, R., and Bialek, W. (2006). Weak pairwise correlations imply strongly corre-  
788 lated network states in a neural population. *Nature*, 440(7087):1007–1012.
- 789 Seung, H., Lee, D. D., Reis, B. Y., and Tank, D. W. (2000). Stability of the Memory of Eye Position in a Recurrent  
790 Network of Conductance-Based Model Neurons. *Neuron*, 26(1):259–271.
- 791 Seung, H. S. (1996). How the brain keeps the eyes still. *Proceedings of the National Academy of Sciences*,  
792 93(23):13339–13344.
- 793 Stevenson, R. D. and Josephson, R. K. (1990). Effects of operating frequency and temperature on mechanical  
794 power output from moth flight muscle. *Journal of Experimental Biology*, 149(1):61–78.
- 795 Tang, L. S., Goeritz, M. L., Caplan, J. S., Taylor, A. L., Fisek, M., and Marder, E. (2010). Precise Temperature  
796 Compensation of Phase in a Rhythmic Motor Pattern. *PLoS Biology*, 8(8):e1000469.
- 797 Tavoni, G., Cocco, S., and Monasson, R. (2016). Neural assemblies revealed by inferred connectivity-based  
798 models of prefrontal cortex recordings. *Journal of Computational Neuroscience*, 41(3):269–293.
- 799 Tavoni, G., Ferrari, U., Battaglia, F. P., Cocco, S., and Monasson, R. (2017). Functional coupling networks inferred  
800 from prefrontal cortex activity show experience-related effective plasticity. *Network Neuroscience*, 1(3):275–  
801 301.
- 802 Tkačik, G., Mora, T., Marre, O., Amodei, D., Palmer, S. E., Berry, M. J., and Bialek, W. (2015). Thermodynam-  
803 ics and signatures of criticality in a network of neurons. *Proceedings of the National Academy of Sciences*,  
804 112(37):11508–11513.
- 805 Tsodyks, M. and Sejnowski, T. (1995). Associative memory and hippocampal place cells. *International journal of*  
806 *neural systems*, 6:81–86.
- 807 Tubiana, J., Wolf, S., Panier, T., and Debrégeas, G. (2020). Blind deconvolution for spike inference from fluores-  
808 cence recordings. *Journal of Neuroscience Methods*, 342:108763.
- 809 van der Plas, T. L., Tubiana, J., Goc, G. L., Migault, G., Kunst, M., Baier, H., Bormuth, V., Englitz, B., and Debrégeas,  
810 G. (2021). Neural assemblies uncovered by generative modeling explain whole-brain activity statistics and  
811 reflect structural connectivity. *Biorxiv*.
- 812 Vladimirov, N., Mu, Y., Kawashima, T., Bennett, D. V., Yang, C.-T., Looger, L. L., Keller, P. J., Freeman, J., and Ahrens,  
813 M. B. (2014). Light-sheet functional imaging in fictively behaving zebrafish. *Nature Methods*, 11(9):883–884.
- 814 Wang, X.-J. (2008). Decision making in recurrent neuronal circuits. *Neuron*, 60(2):215–234.
- 815 Wolf, S., Dubreuil, A. M., Bertoni, T., Böhm, U. L., Bormuth, V., Candelier, R., Karpenko, S., Hildebrand, D. G. C.,  
816 Bianco, I. H., Monasson, R., and Debrégeas, G. (2017). Sensorimotor computation underlying phototaxis in  
817 zebrafish. *Nature Communications*, 8(1):651.
- 818 Wolf, S., Supatto, W., Debrégeas, G., Mahou, P., Kruglik, S. G., Sintes, J.-M., Beaurepaire, E., and Candelier, R.  
819 (2015). Whole-brain functional imaging with two-photon light-sheet microscopy. *Nature methods*, 12(5):379–  
820 380.
- 821 Zaksas, D. and Pasternak, T. (2006). Directional signals in the prefrontal cortex and in area MT during a working  
822 memory for visual motion task. *Journal of Neuroscience*, 26(45):11726–11742.
- 823 Zylberberg, J. and Strowbridge, B. W. (2017). Mechanisms of persistent activity in cortical circuits: Possible  
824 neural substrates for working memory. *Annual Review of Neuroscience*, 40(1):603–627.



## 825 Appendix 1

### 826 Mean-field theory for the ARTR activity

#### 827 Derivation of the free energy

We consider an Ising model with  $N_L$  and  $N_R$  neurons in, respectively, the left and right regions. Each neuron activity variable can take two values,  $s_i = 0, 1$ , corresponding to silent and active states (within a time window). The “energy” of the system reads

$$828 \quad E(s_1, \dots, s_{N_L}, s_{N_L+1}, \dots, s_{N_L+N_R}) = -\tilde{H}_L \sum_{i=1}^{N_L} s_i - \tilde{H}_R \sum_{i=N_L+1}^{N_L+N_R} s_i - \frac{1}{2} \sum_{i \neq j} \tilde{J}_{ij} s_i s_j, \quad (12)$$

832 where  $\tilde{H}_L, \tilde{H}_R$  are biases acting on the neurons, and the coupling matrix is defined through

$$833 \quad \tilde{J}_{ij} = \begin{cases} \tilde{J}_L & \text{if } 1 \leq i, j \leq N_L, \\ \tilde{J}_R & \text{if } N_L + 1 \leq i, j \leq N_L + N_R, \\ \tilde{I} & \text{otherwise.} \end{cases} \quad (13)$$

837 We now introduce the left and right average activities:

$$838 \quad m_L = \frac{1}{N_L} \sum_{i=1}^{N_L} s_i, \quad m_R = \frac{1}{N_R} \sum_{i=N_L+1}^{N_L+N_R} s_i. \quad (14)$$

841 The energy  $E$  of a neural activity configuration in Eq. 12 can be expressed in terms of these average activities:

$$842 \quad E(m_L, m_R) = -N_L \left( \tilde{H}_L - \frac{\tilde{J}_L}{2} \right) m_L - N_R \left( \tilde{H}_R - \frac{\tilde{J}_R}{2} \right) m_R \\ 843 \quad - \frac{(N_L)^2}{2} \tilde{J}_L m_L^2 - \frac{(N_R)^2}{2} \tilde{J}_R m_R^2 - \tilde{I} N_L N_R m_L m_R. \quad (15)$$

We may now compute the partition function normalizing the probability of configurations,

$$844 \quad Z = \sum_{\{s_i=0,1\}} e^{-E(s_1, \dots, s_{N_L+N_R})} = \sum_{m_L, m_R} \mathcal{M}_L(m_L) \mathcal{M}_R(m_R) e^{-E(m_L, m_R)}, \quad (16)$$

845 where the sums runs over fractional values of the average left and right activities, from 0 to 1 with steps equal to, respectively,  $2/N_L$  and  $2/N_R$ , and the multiplicities  $\mathcal{M}_L$  and  $\mathcal{M}_R$  measure the numbers of neural configurations with prescribed average activities. We approximate these multiplicities with the standard entropy-based expressions, which are exact in the limit of large sizes  $N_L, N_R$ :

$$846 \quad \mathcal{M}_L(m_L) \simeq e^{N_L S(m_L)}, \quad \mathcal{M}_R(m_R) \simeq e^{N_R S(m_R)}, \quad (17)$$

where

$$847 \quad S(m) = -m \ln m - (1 - m) \ln(1 - m) \quad (18)$$

is the entropy of a 0–1 variable with mean  $m$ . As a consequence the activity-dependent free energy is given by

$$848 \quad \mathcal{F}(m_L, m_R) = E(m_L, m_R) - N_L S(m_L) - N_R S(m_R) \\ 849 \quad = -\frac{N_L \tilde{J}_L}{2} m_L^2 - \frac{N_R \tilde{J}_R}{2} m_R^2 - \tilde{I} \sqrt{N_L N_R} m_L m_R - N_L \tilde{H}_L m_L - N_R \tilde{H}_R m_R \\ 850 \quad + N_L (m_L \ln m_L + (1 - m_L) \ln(1 - m_L)) + N_R (m_R \ln m_R + (1 - m_R) \ln(1 - m_R)) \quad (19)$$

867

868

869

870

871

872

873

874

875

876

877

878

879

880

881

882

883

884

885

886

887

888

889

890

891

892

893

894

895

896

897

898

899

900

901

902

903

904

905

906

907

908

909

910

where the bias and coupling parameters are, respectively,  $H_L = \tilde{H}_L - \frac{J_L}{2}$ ,  $H_R = \tilde{H}_R - \frac{J_R}{2}$ ,  $J_L = N_L \tilde{J}_L$ ,  $J_R = N_R \tilde{J}_R$ ,  $I = \sqrt{N_L N_R} \tilde{I}$ .

The sizes  $N_L, N_R$  enter formula (19) for the free energy in two ways:

- *implicitly*, through the biases  $H_L, H_R$  and the couplings  $J_L, J_R, I$ . These parameters are equal to, respectively, the average bias and the total ipsilateral and contralateral couplings acting on each neuron in the  $L$  and  $R$  regions. They are effective parameters defining the mean-field theory;
- *explicitly*, as multiplicative factors to the free energy contributions coming from the left and right regions. The sizes then merely act as effective inverse "temperatures", in the Boltzmann factor  $e^{-F(m_L, m_R)}$  associated to the probability of the  $L, R$  activities.

Mean-field theory generally overestimates the collective effects of interactions; a well-known illustration of this artifact is the prediction of the existence of a phase transition in the uni-dimensional ferromagnetic Ising model with short range interactions, while such a transition is rigorously known not to take place (Ma, 1985). We expect these effects to be strong here, due to the wide distribution of inferred Ising couplings (Appendix 2 Figure 4A). Many pairs of neurons carry close to zero couplings, and the interaction neighborhood of a neuron is effectively much smaller than  $N_L$  and  $N_R$ . To compensate for the overestimation of interaction effects we thus propose to keep Eq. 19 for the free energy, but with effective sizes  $K_L, K_R$  replacing the numbers  $N_L, N_R$  of recorded neurons, see Eq. 2, leading to the expression of the free energy:

$$\mathcal{F}(m_L, m_R) = -\frac{K_L J_L}{2} m_L^2 - \frac{K_R J_R}{2} m_R^2 - I \sqrt{K_L K_R} m_L m_R - K_L H_L m_L - K_R H_R m_R \quad (20)$$

$$+ K_L (m_L \ln m_L + (1 - m_L) \ln(1 - m_L)) + K_R (m_R \ln m_R + (1 - m_R) \ln(1 - m_R))$$

These effective sizes  $K_L, K_R$  are expected to be smaller than  $N_L, N_R$ . Their values are fixed through the comparison of the Langevin dynamical traces with the traces coming from the data, see below.

### Langevin dynamical equations

The dynamical Langevin equations read

$$\tau \frac{dm_L}{dt} = K_L (J_L m_L + H_L) + I \sqrt{K_L K_R} m_R - K_L \log\left(\frac{m_L}{1 - m_L}\right) + \epsilon_L(t), \quad (21)$$

$$\tau \frac{dm_R}{dt} = K_R (J_R m_R + H_R) + I \sqrt{K_L K_R} m_L - K_R \log\left(\frac{m_R}{1 - m_R}\right) + \epsilon_R(t), \quad (22)$$

where  $\epsilon_L, \epsilon_R$  denote white-noise processes, see main text.

### Fit of the effective sizes $K_L$ and $K_R$

The effective sizes  $K_L = N_L/A$  and  $K_R = N_R/A$  were fitted generating Langevin trajectories of the activities  $(m_L, m_R)$  for a large set of values of  $A$  (i.e.  $K_L$  and  $K_R$ ), and with fixed parameters  $(H_L, H_R, J_L, J_R, \tau)$ . For each value of  $K_L$  and  $K_R$  we computed the Kullback-Leibler (KL) divergence between the experimental and the Langevin distributions of  $(m_L, m_R)$  (see Appendix 2 Figure 7A-C). The effective sizes  $K_L$  and  $K_R$  are the ones that minimize the value of the KL divergence. For low values of  $A$  the KL divergence can be noisy and creates artifacts. To avoid these artifacts we assume that  $A > 2$ .

911 **Appendix 2**

912 **Supplementary figures and tables**

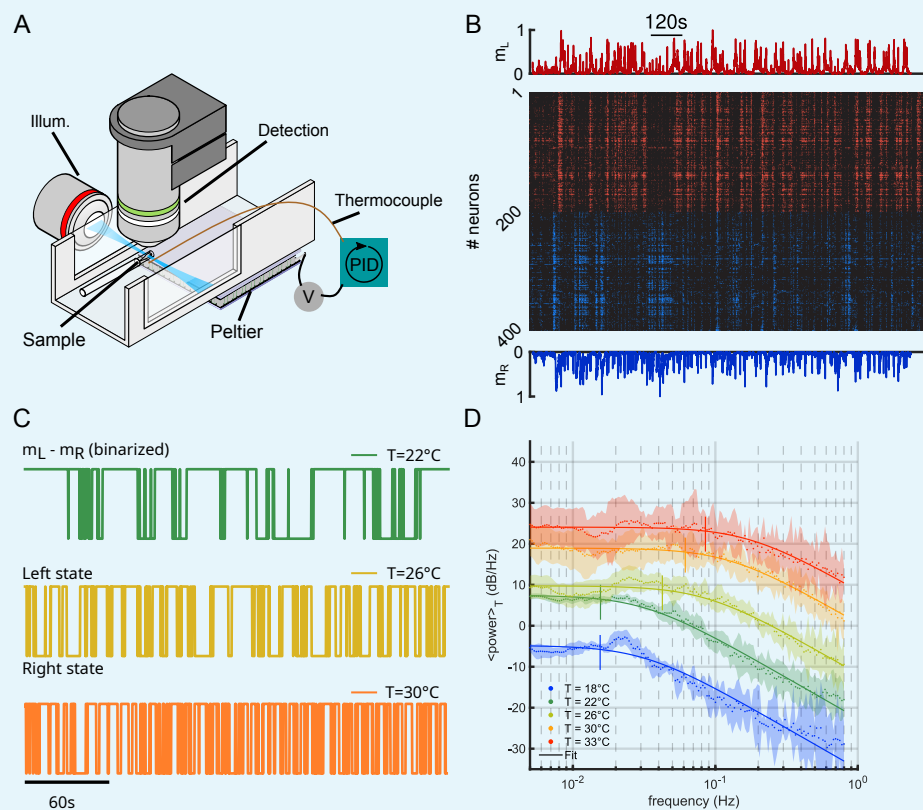

913

914

915

916

917

918

919

920

**Appendix 2 Figure 1. Temperature-dependence of the ARTR activity.**

**A**, Schematic of the experimental setup used to perform brain-wide calcium imaging of a zebrafish larva at controlled water temperature. **B**, Raster plot of the ARTR spontaneous dynamics showing alternating right/left activation. The top and bottom traces are the ARTR average signal of the left and right subcircuits. **C**, Example ARTR  $\text{sign}(m_L - m_R)$  binarized signals measured at 3 different temperatures (same larva). **D**, Averaged power spectrum of the ARTR signals  $m_R - m_L$  for the 5 tested temperatures. Lorentzian fits are shown as solid lines.

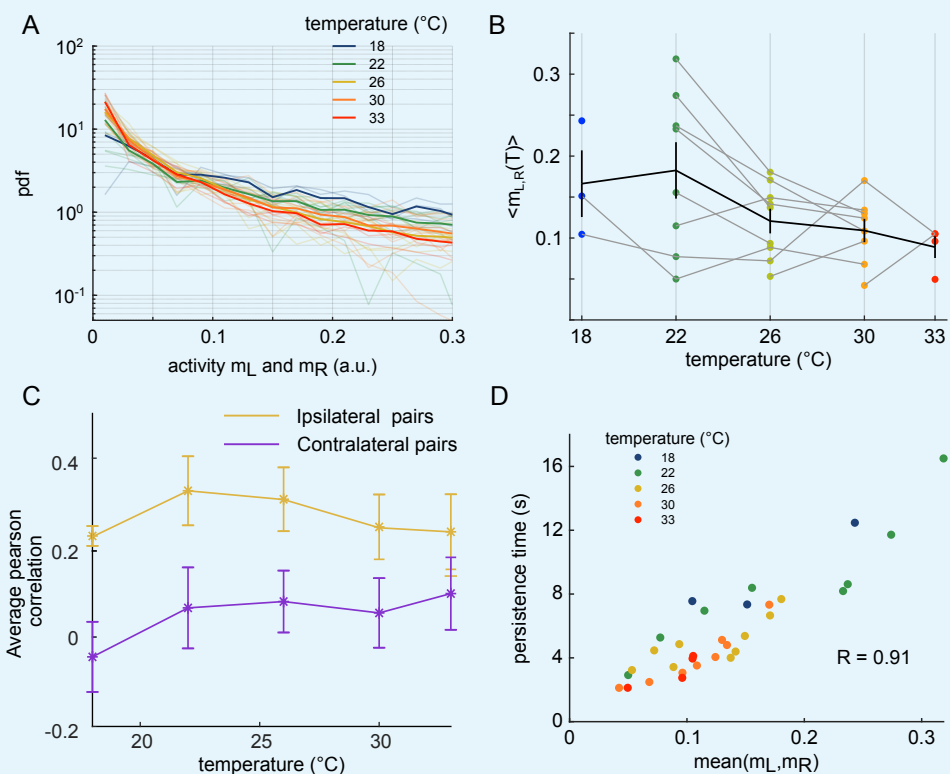

922

923

924

925

926

927

928

929

930

**Appendix 2 Figure 2. Effect of temperature on the ARTR time persistence and activity**

**A**, Pdf of activities of both sides of the ARTR. Color encodes temperature. **B**, Temperature-averaged mean activity of ARTR left and right neuronal subpopulations. Error bars are standard error of the mean. **C**, Temperature-averaged Pearson correlation for left/right ipsilateral pairs (yellow line) or for contralateral pairs of neurons (purple line). Error bars are standard deviations. **D**, ARTR persistence time vs. mean activity; note the quasi-linear dependence of these quantities ( $R = 0.91$ ). Each dot is the mean persistence time computed for one fish at one temperature, colors encode temperature.

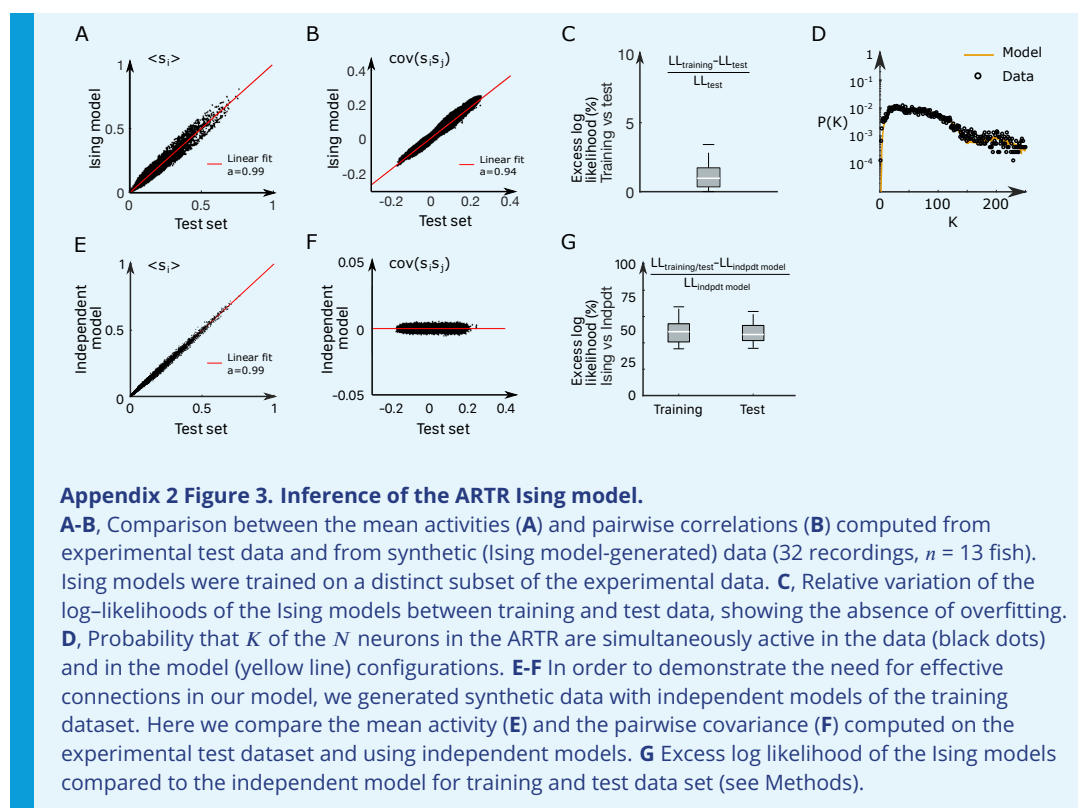

931  
932  
933  
934  
935  
936  
937  
938  
939  
940  
941  
942  
943



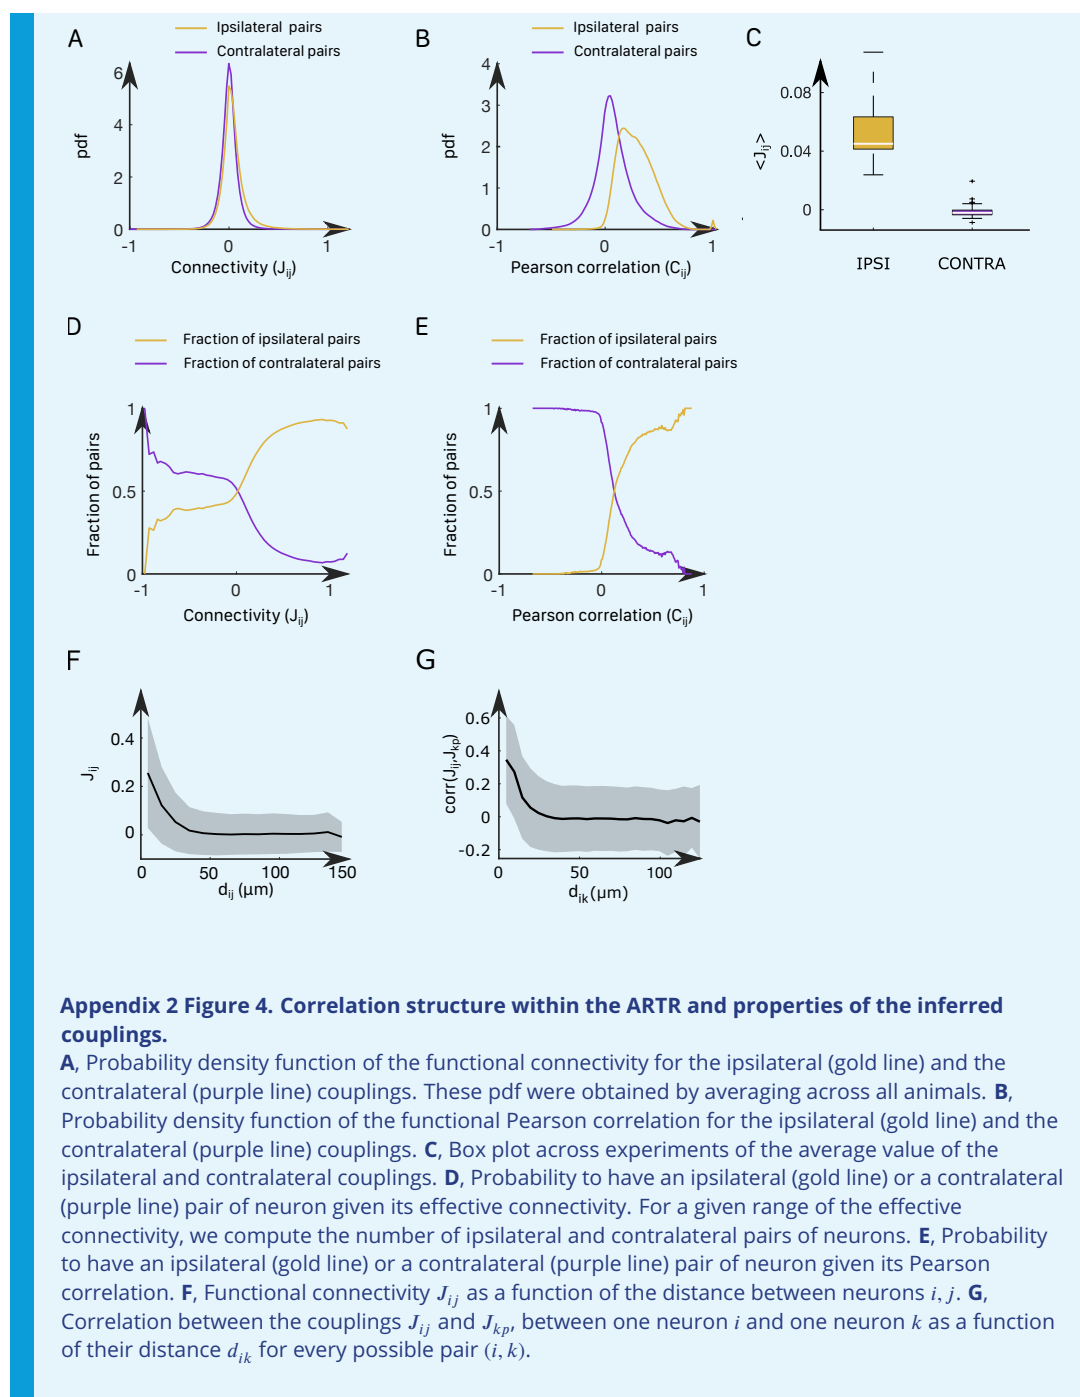

944  
945  
946  
947  
948  
949  
950  
951  
952  
953  
954  
955  
956  
958

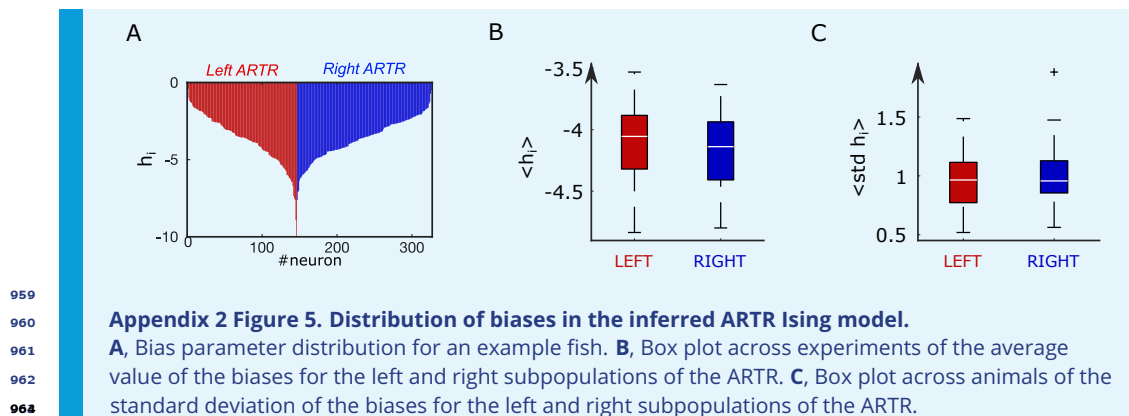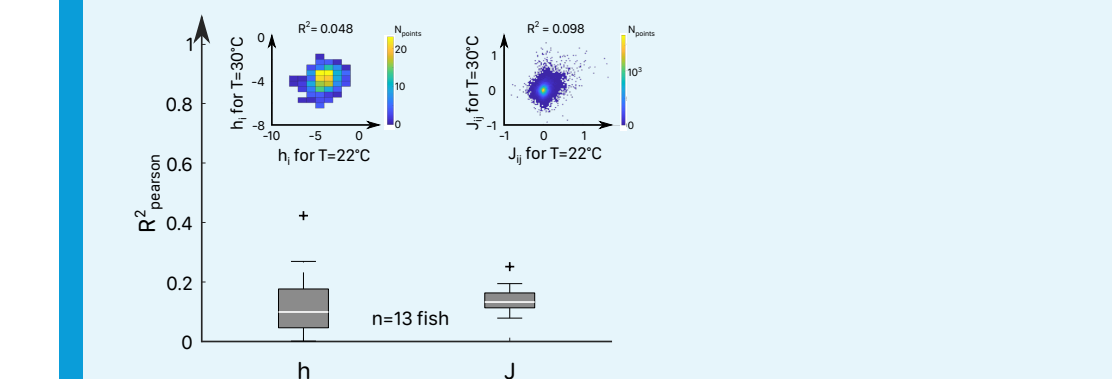

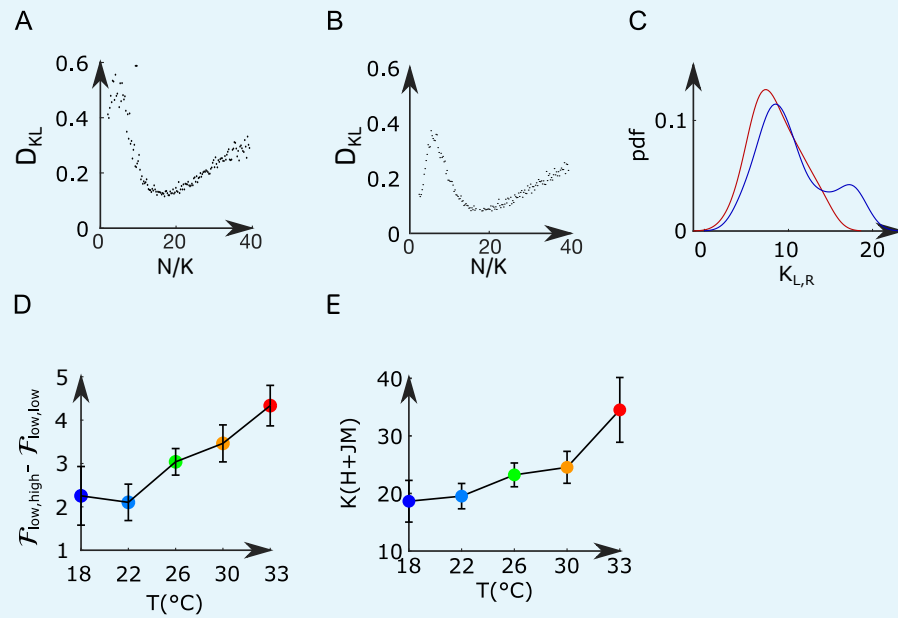

973

974

975

976

977

978

979

980

982

#### Appendix 2 Figure 7. Mean-field model of the ARTR.

**A-B**, Kullback-Leibler divergence between the experimental and the Langevin distributions as a function of  $N/K$  where  $N$  is the total number of neurons of the left or right subpopulation, and  $K$  is the effective extent of neuronal interaction (see Methods) for two data sets. **C**, Probability density function of  $K_R$  (blue line) and  $K_L$  (red line) across all recordings. **D**, Free-energy difference between stationary states of the landscape as a function of the temperature. **E**, Average values (for all experiments and regions) of  $K(H+JM)$  as a function of the temperature of the water. Error bars are standard error of the mean.

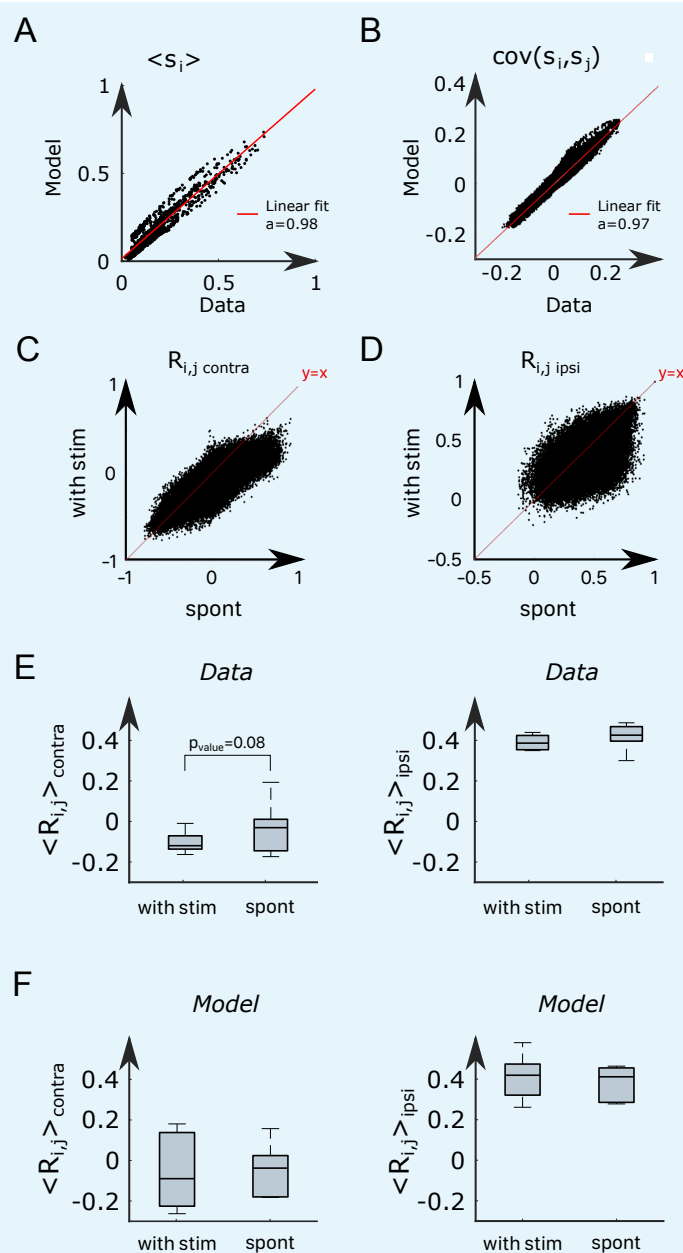

983  
984  
985  
986  
987  
988  
989  
990  
991  
992  
993

**Appendix 2 Figure 8. A modified Ising model explains visually-driven properties of the ARTR.**

**A-B**, To assess the performance of the model for visually-driven experiments, we compare the mean activity (**A**) and the pairwise covariance (**B**) computed on the spontaneous part of the recordings to synthetic data. **C**, Scatter plot of the correlation between contralateral pairs of neurons under visual stimulation vs. spontaneous activity on  $n = 6$  fish. **D**, Scatter plot of the correlation between ipsilateral pairs of neurons under visual stimulation vs. spontaneous activity. **E**, Average Pearson correlation in the experimental recordings between contralateral (the pvalue of a paired sampled ttest is provided) and ipsilateral pairs of cells during stimulated and spontaneous activity ( $n = 6$  fish). **F**, Average Pearson correlation in the simulated activity of the ARTR between contralateral and ipsilateral pairs of cells during stimulated and spontaneous activity ( $n = 6$  fish).

| Temperature (°C) | ID | Line     | Age (dpf) | $N_L$ | $N_R$ | Acquisition rate (Hz) | Duration (s) |
|------------------|----|----------|-----------|-------|-------|-----------------------|--------------|
| 18               | 12 | NucFast  | 6         | 146   | 180   | 5                     | 1200         |
| 18               | 13 | NucFast  | 7         | 37    | 96    | 8                     | 1200         |
| 18               | 14 | NucFast  | 6         | 179   | 174   | 8                     | 1200         |
| 22               | 2  | Nuc slow | 7         | 177   | 212   | 3                     | 1106         |
| 22               | 3  | NucFast  | 5         | 152   | 85    | 3                     | 1812         |
| 22               | 5  | NucFast  | 5         | 158   | 123   | 5                     | 1500         |
| 22               | 6  | NucFast  | 5         | 98    | 134   | 5                     | 1500         |
| 22               | 7  | NucFast  | 6         | 122   | 221   | 5                     | 1500         |
| 22               | 11 | NucFast  | 6         | 295   | 320   | 5                     | 1200         |
| 22               | 13 | NucFast  | 7         | 37    | 96    | 8                     | 1200         |
| 22               | 14 | NucFast  | 6         | 179   | 174   | 8                     | 1200         |
| 26               | 2  | Nuc slow | 7         | 177   | 212   | 3                     | 1812         |
| 26               | 3  | NucFast  | 5         | 152   | 85    | 3                     | 1812         |
| 26               | 4  | NucFast  | 5         | 110   | 76    | 3                     | 1812         |
| 26               | 5  | NucFast  | 5         | 158   | 123   | 5                     | 1500         |
| 26               | 6  | NucFast  | 5         | 98    | 134   | 5                     | 1500         |
| 26               | 7  | NucFast  | 6         | 122   | 221   | 5                     | 1500         |
| 26               | 11 | NucFast  | 6         | 295   | 320   | 5                     | 1200         |
| 26               | 13 | NucFast  | 7         | 37    | 96    | 8                     | 1200         |
| 26               | 14 | NucFast  | 6         | 179   | 174   | 8                     | 1200         |
| 30               | 2  | Nuc slow | 7         | 177   | 212   | 3                     | 1812         |
| 30               | 4  | NucFast  | 5         | 110   | 76    | 3                     | 1812         |
| 30               | 5  | NucFast  | 5         | 158   | 123   | 5                     | 1500         |
| 30               | 6  | NucFast  | 5         | 98    | 134   | 5                     | 1500         |
| 30               | 7  | NucFast  | 6         | 122   | 221   | 5                     | 1500         |
| 30               | 13 | NucFast  | 7         | 37    | 96    | 8                     | 1200         |
| 30               | 14 | NucFast  | 6         | 179   | 174   | 8                     | 1200         |
| 30               | 15 | NucFast  | 7         | 202   | 252   | 8                     | 1200         |
| 33               | 14 | NucFast  | 6         | 179   | 174   | 8                     | 1200         |
| 33               | 15 | NucFast  | 7         | 202   | 252   | 8                     | 1200         |
| 33               | 16 | NucFast  | 6         | 127   | 123   | 7                     | 1200         |
| 33               | 17 | NucFast  | 5         | 62    | 170   | 10                    | 1200         |

995

996

998

**Appendix 2 Table 1.** Datasets properties.



| Temperature (°C) | ID | $J_L$ | $J_R$ | $I$   | $H_L$ | $H_R$ | $K_L$ | $K_R$ |
|------------------|----|-------|-------|-------|-------|-------|-------|-------|
| 18               | 12 | 7.06  | 7.23  | -0.6  | -3.66 | -3.63 | 6.51  | 8.03  |
| 18               | 13 | 6.2   | 7.84  | 0.6   | -3.53 | -4.34 | 3.18  | 8.27  |
| 18               | 14 | 7.27  | 7.24  | 0.31  | -3.88 | -3.99 | 11.04 | 10.74 |
| 22               | 2  | 8.2   | 8.28  | 0.12  | -4.24 | -4.23 | 6.65  | 7.96  |
| 22               | 3  | 8.18  | 7.14  | 0.55  | -4.26 | -4.13 | 9.38  | 5.24  |
| 22               | 5  | 7.59  | 7.01  | 0.4   | -4.03 | -3.8  | 5.56  | 4.33  |
| 22               | 6  | 7.13  | 8.69  | 1.1   | -4.49 | -4.64 | 5.21  | 7.12  |
| 22               | 7  | 7.09  | 7.46  | 0.43  | -3.73 | -3.95 | 6.28  | 11.39 |
| 22               | 11 | 7.82  | 7.59  | -0.1  | -4.07 | -3.91 | 8.28  | 8.98  |
| 22               | 13 | 6.54  | 7.82  | 1.45  | -4.29 | -4.5  | 7.11  | 18.46 |
| 22               | 14 | 7.41  | 8.03  | 0.47  | -4.28 | -4.43 | 10.91 | 10.6  |
| 26               | 2  | 8.37  | 8.22  | -0.49 | -4.47 | -4.31 | 9.72  | 11.64 |
| 26               | 3  | 8.42  | 7.49  | 0.53  | -4.56 | -4.62 | 8.26  | 4.61  |
| 26               | 4  | 8.63  | 6.44  | 0.85  | -4.83 | -4.79 | 10.37 | 7.16  |
| 26               | 5  | 7.29  | 7.59  | 0.48  | -3.92 | -4.14 | 9.08  | 7.06  |
| 26               | 6  | 7.43  | 7.86  | 0.41  | -3.99 | -4.1  | 8.59  | 11.75 |
| 26               | 7  | 7.55  | 7.96  | 0.32  | -4.08 | -4.22 | 4.45  | 8.06  |
| 26               | 11 | 7.27  | 7.45  | 0.37  | -3.89 | -3.92 | 10.31 | 11.18 |
| 26               | 13 | 6.99  | 7.3   | 0.6   | -3.99 | -3.94 | 6.37  | 16.55 |
| 26               | 14 | 7.91  | 7.35  | 0.5   | -4.34 | -4.16 | 11.32 | 11.01 |
| 30               | 2  | 7.54  | 7.96  | -0.12 | -4.54 | -4.56 | 7.02  | 8.41  |
| 30               | 4  | 8.36  | 7.73  | 0.11  | -4.52 | -4.18 | 9.64  | 6.66  |
| 30               | 5  | 6.77  | 6.42  | 0.66  | -3.8  | -3.87 | 9.18  | 7.15  |
| 30               | 6  | 7.35  | 7.38  | 0.45  | -3.91 | -3.97 | 7.53  | 10.3  |
| 30               | 7  | 7.43  | 8.07  | 0.42  | -3.93 | -4.38 | 7.09  | 12.84 |
| 30               | 13 | 6.91  | 7.41  | 0.73  | -4.13 | -4.03 | 5.78  | 15    |
| 30               | 14 | 7.51  | 7.45  | 0.11  | -3.87 | -3.89 | 9.42  | 9.15  |
| 30               | 15 | 8.01  | 8.33  | 0.58  | -4.45 | -4.46 | 13.83 | 17.26 |
| 33               | 14 | 6.74  | 7.02  | 0.76  | -3.8  | -3.97 | 9.32  | 9.06  |
| 33               | 15 | 6.99  | 7.47  | -0.02 | -3.68 | -3.91 | 14.85 | 18.52 |
| 33               | 16 | 7.53  | 8.25  | -0.11 | -4.16 | -4.43 | 14.43 | 13.97 |
| 33               | 17 | 6.66  | 7.36  | 0.45  | -3.69 | -3.89 | 11.92 | 32.69 |

999

1000

**Appendix 2 Table 2.** Parameters of mean-field models.

| ID | $J_L$ | $J_R$ | $I$   | $H_L$ | $H_R$ | $K_L$ | $K_R$ |
|----|-------|-------|-------|-------|-------|-------|-------|
| 1  | 7,54  | 7,35  | -0,67 | -3,75 | -3,44 | 5,60  | 3,43  |
| 2  | 7,10  | 7,42  | 0,64  | -3,69 | -4,02 | 7,91  | 12,82 |
| 3  | 7,51  | 7,92  | -0,28 | -3,96 | -4,08 | 4,98  | 3,90  |
| 4  | 8,38  | 6,25  | -0,04 | -3,68 | -3,18 | 13,33 | 4,44  |
| 5  | 8,73  | 8,24  | 0,01  | -4,38 | -4,13 | 6,11  | 6,89  |
| 6  | 7,87  | 7,71  | 0,51  | -4,17 | -4,09 | 16,19 | 15,52 |

1002

1003

1005

**Appendix 2 Table 3.** Parameters of the mean-field model for two-photon light-sheet data sets from Wolf et. al 2017.
